# Supplementary material for: Copper-catalyzed oxidative decarboxylative coupling of α-keto acids and sulfoximines
Source: Royal Society of Chemistry journal article supplement (doi:10.1039/c7ob00776k), 2017-01-01

## Supplementary Information

### Copper-Catalyzed Oxidative Decarboxylative Coupling of $\alpha$ -Keto Acids and Sulfoximines

Chaleena Pimpasri, Ladawan Sumunnee and Sirilata Yotphan\*

*Center of Excellence for Innovation in Chemistry (PERCH-CIC),*

*Department of Chemistry, Faculty of Science, Mahidol University, Bangkok 10400, Thailand*

*E-mail: [sirilata.yot@mahidol.ac.th](mailto:sirilata.yot@mahidol.ac.th)*

#### Table of Contents

|      |                           |     |
|------|---------------------------|-----|
| I.   | Reaction Optimization     | S-2 |
| II.  | Miscellaneous Experiments | S-3 |
| III. | Spectral Data             | S-5 |

## I. Reaction Optimization

Table S1. Effect of Metal Catalyst<sup>a</sup>

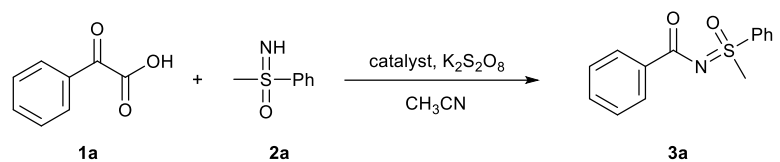

| entry    | catalyst                        | mol%      | %yield <sup>b</sup> |
|----------|---------------------------------|-----------|---------------------|
| 1        | AgNO <sub>3</sub>               | 10        | trace               |
| 2        | AgOAc                           | 10        | 9                   |
| 3        | Ag <sub>2</sub> CO <sub>3</sub> | 10        | trace               |
| 4        | NiCl <sub>2</sub>               | 10        | 50                  |
| 5        | Pd(OAc) <sub>2</sub>            | 10        | 23                  |
| 6        | Fe(OAc) <sub>2</sub>            | 10        | no reaction         |
| <b>7</b> | <b>CuBr</b>                     | <b>10</b> | <b>75</b>           |
| 8        | CuBr <sub>2</sub>               | 10        | 68                  |
| 9        | CuBr                            | 5         | 65                  |
| 10       | CuBr                            | 20        | 74                  |
| 11       | CuBr <sup>c</sup>               | 10        | 13                  |
| 12       | -                               | -         | trace               |

<sup>a</sup>Conditions: **1a** (0.5 mmol), **2a** (1.0 mmol), K<sub>2</sub>S<sub>2</sub>O<sub>8</sub> (0.55 mmol), CH<sub>3</sub>CN (3 mL), 1 h. <sup>b</sup>GC yield.

<sup>c</sup>10 mol% of AgNO<sub>3</sub> (co-catalyst) was added to the reaction.

Table S2. Effect of Oxidant and Temperature<sup>a</sup>

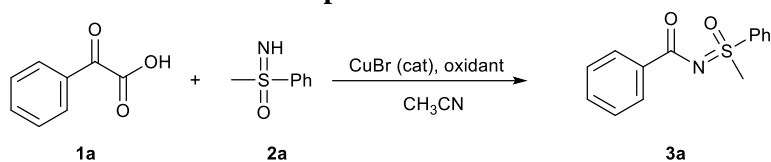

| entry    | oxidant                                        | equiv.     | temperature (°C) | %yield <sup>b</sup> |
|----------|------------------------------------------------|------------|------------------|---------------------|
| 1        | K <sub>2</sub> S <sub>2</sub> O <sub>8</sub>   | 1.1        | rt               | 43                  |
| 2        | K <sub>2</sub> S <sub>2</sub> O <sub>8</sub>   | 1.1        | 40               | 48                  |
| 3        | K <sub>2</sub> S <sub>2</sub> O <sub>8</sub>   | 1.1        | 50               | 55                  |
| 4        | K <sub>2</sub> S <sub>2</sub> O <sub>8</sub>   | 1.1        | 60               | 61                  |
| 5        | K <sub>2</sub> S <sub>2</sub> O <sub>8</sub>   | 1.1        | 70               | 73                  |
| <b>6</b> | <b>K<sub>2</sub>S<sub>2</sub>O<sub>8</sub></b> | <b>1.1</b> | <b>75</b>        | <b>75</b>           |
| 7        | K <sub>2</sub> S <sub>2</sub> O <sub>8</sub>   | 1.1        | 80               | 71                  |
| 8        | K <sub>2</sub> S <sub>2</sub> O <sub>8</sub>   | 2.0        | 75               | 69                  |
| 9        | K <sub>2</sub> S <sub>2</sub> O <sub>8</sub>   | 3.0        | 75               | 64                  |
| 10       | TBHP                                           | 1.1        | 75               | 2                   |
| 11       | DTBP                                           | 1.1        | 75               | 20                  |
| 12       | -                                              | -          | 75               | trace               |

<sup>a</sup>Conditions: **1a** (0.5 mmol), **2a** (1.0 mmol), CuBr (0.05 mmol), CH<sub>3</sub>CN (3 mL), 1 h. <sup>b</sup>GC yield.

## II. Miscellaneous Experiments

### Control experiment

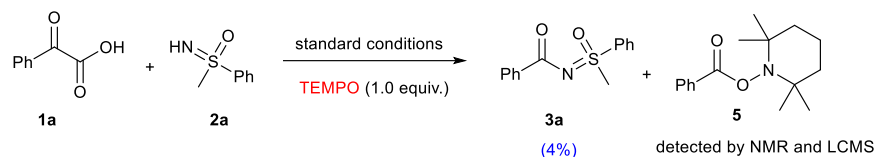

2,2,6,6-Tetramethylpiperidin-1-yl benzoate (radical coupling adduct **5**): White solid;  $^1\text{H}$  NMR (400 MHz,  $\text{CDCl}_3$ ):  $\delta$  8.09 (d,  $J = 7.2$  Hz, 2H), 7.59 (t,  $J = 7.6$  Hz, 1H), 7.49–7.45 (m, 2H), 1.83–1.68 (m, 3H), 1.62–1.58 (m, 2H), 1.49–1.45 (m, 2H), 1.28 (s, 6H), 1.13 (s, 6H);  $^{13}\text{C}$  NMR (100 MHz,  $\text{CDCl}_3$ ):  $\delta$  166.1, 132.6, 129.3, 128.2, 60.1, 38.8, 31.7, 20.6, 16.7.

(Reference: S. Yang, H. Tan, W. Ji, X. Zhang, P. Li, and L. Wang, *Adv. Synth. Catal.*, 2017, **359**, 443.)

### General Procedure for the Preparation of *NH*-Sulfoximine

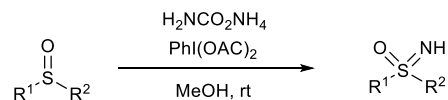

The sulfoxide (4.0 mmol, 1.0 equiv.),  $\text{PhI(OAc)}_2$  (3.87 g, 12.0 mmol, 3.0 equiv.), ammonium carbamate ( $\text{H}_2\text{NCO}_2\text{NH}_4$ , 1.25 g, 16.0 mmol, 4.0 equiv.) and MeOH (8.0 mL) were added to a 50 mL round bottom flask equipped with a magnetic stir bar. The reaction was stirred for 30 min at room temperature in an open flask. Upon completion, a solvent was removed *in vacuo* and the crude residue was purified by flash silica gel ( $\text{SiO}_2$ ) column chromatography.

(Reference: M. Zenzola, R. Doran, L. Degennaro, R. Luisi and J. A. Bull, *Angew. Chem. Int. Ed.*, 2016, **55**, 7203.)

### General Procedure for the Preparation of $\alpha$ -keto acid

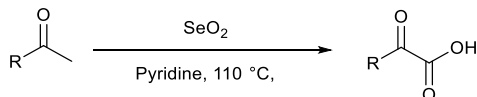

Substituted aryl-methylketone (10.0 mmol, 1.0 equiv.), selenium dioxide ( $\text{SeO}_2$ , 1.65 g, 15.0 mmol, 1.5 equiv.), and anhydrous pyridine (4 mL, 50 mmol) were added, respectively, to a 50 mL round bottom flask equipped with a magnetic bar. The reaction mixture was heated in an oil bath under Ar at  $110^\circ\text{C}$  for 4 h. Upon completion (monitoring by TLC), the reaction mixture was cooled to room temperature and filtered. The residue was washed with ethyl acetate (50 mL). The combined filtrate was treated with 1 M HCl (20 mL), the organic layer was separated, and the aqueous layer was extracted with ethyl acetate ( $3 \times 50$  mL). Then, the combined organic layers were treated with 1 M NaOH (50 mL), and the aqueous layer

was separated. The organic layer was extracted with water (25 mL) and the combined aqueous layers were added dropwise with 1 M HCl until pH = 1–2. The mixture was extracted with ethyl acetate (3 × 50 mL), and the combined organic layers were dried with anhydrous Na<sub>2</sub>SO<sub>4</sub> and concentrated *in vacuo*. The resulting  $\alpha$ -keto acid was used in the copper-catalyzed decarboxylative arylation without further purification.

(Reference: K. Wadhwa, C.-X. Yang, P. R. West, K. C. Deming, S. R. Chemburkar and R. E. Reddy, *Synth. Commun.*, 2008, **38**, 4434.)

### III. Spectral Data of Compounds 3a–3i and 4a–4n

#### *N*-Benzoyl-*S*-methyl-*S*-phenyl sulfoximine (3a)

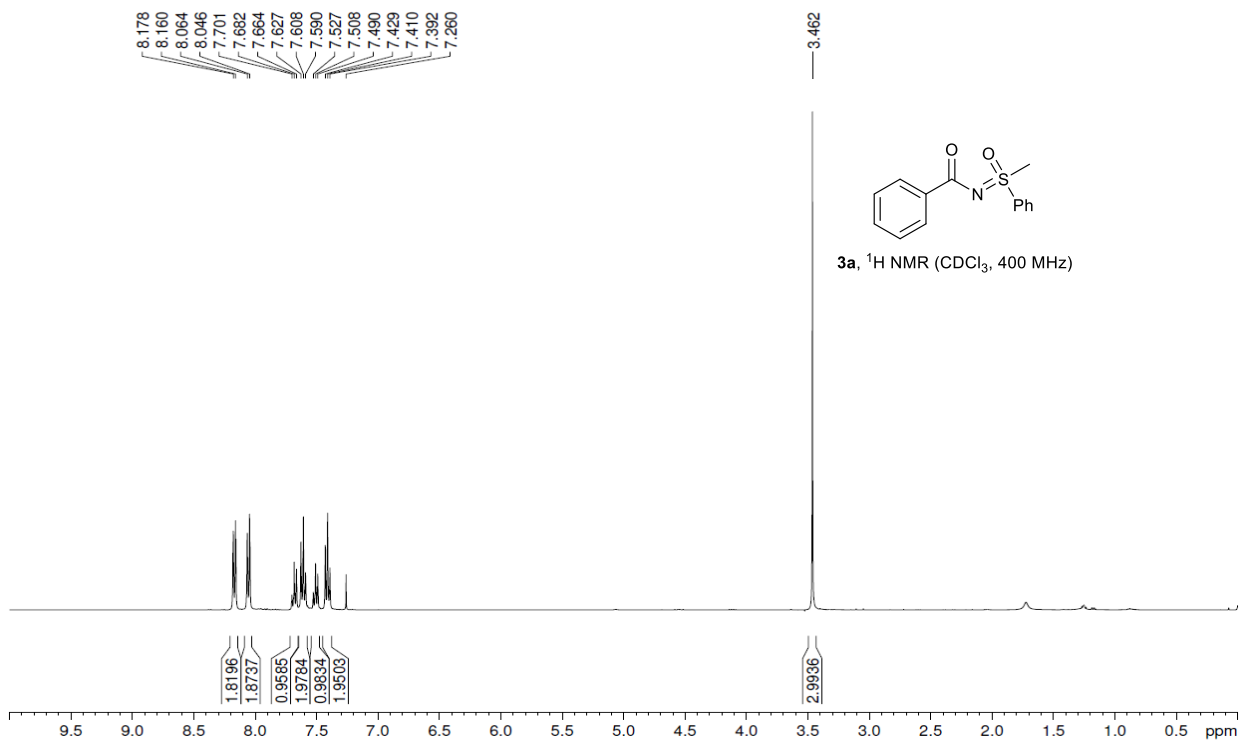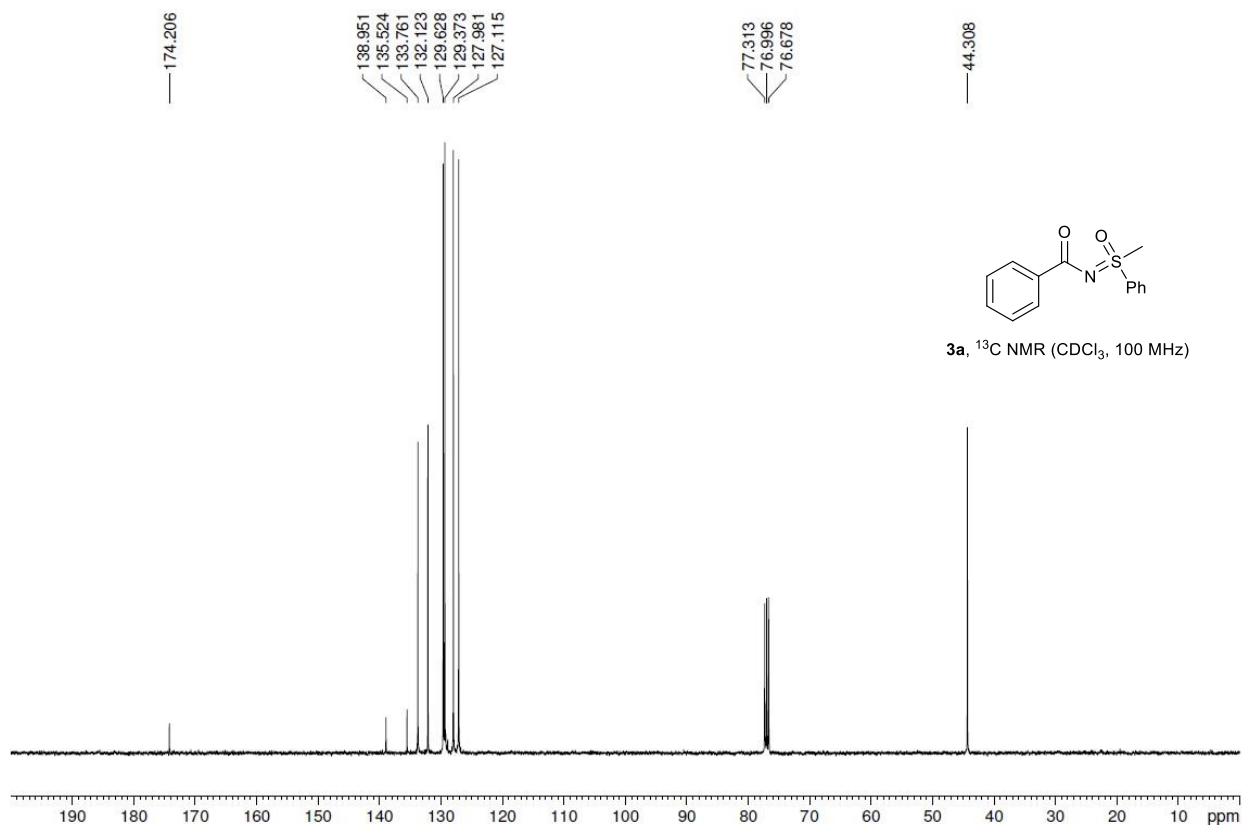

***N*-Benzoyl-*S,S*-diphenyl sulfoximine (3b)**

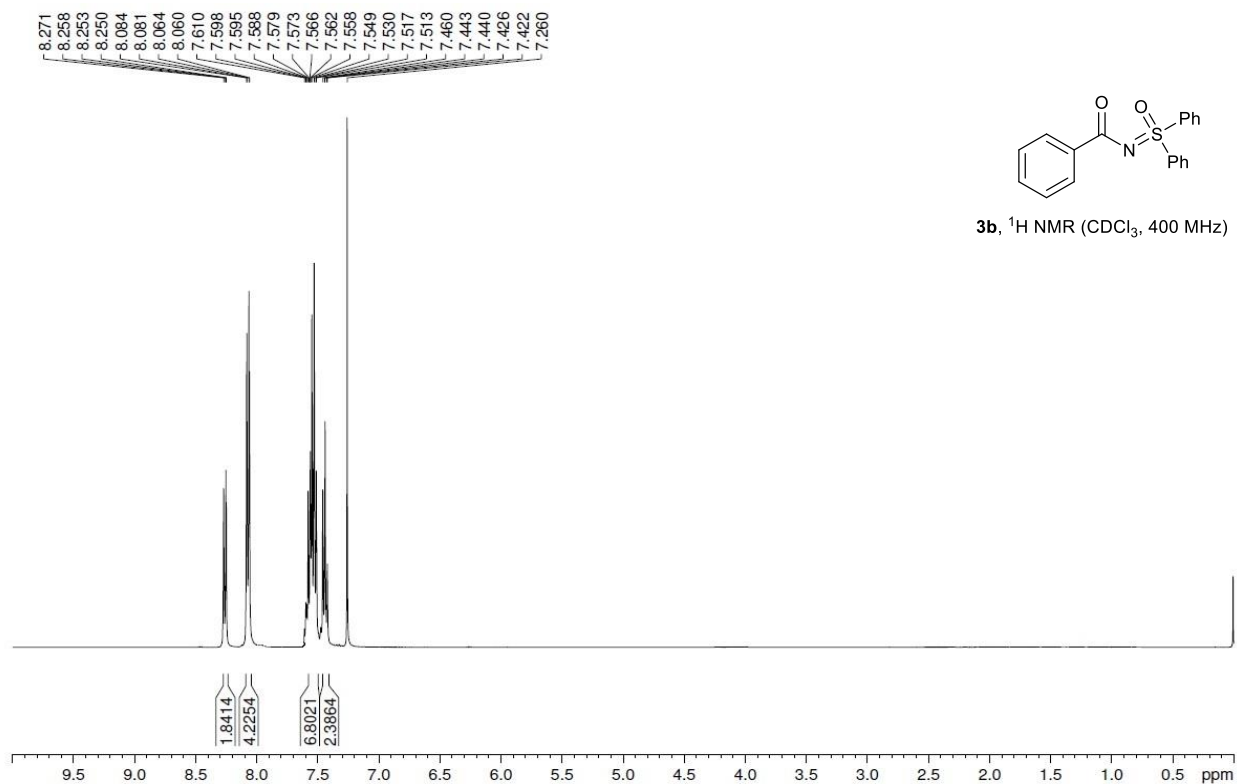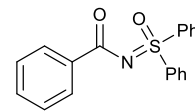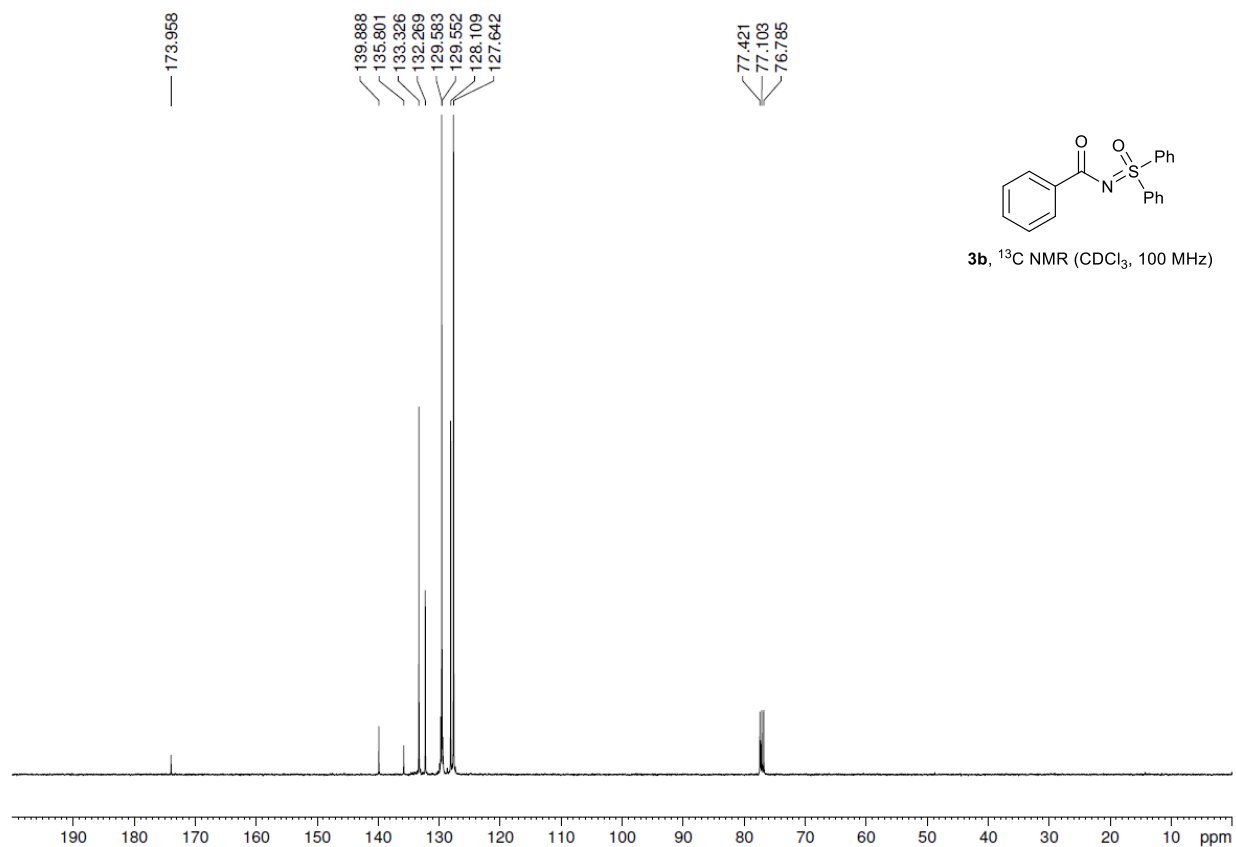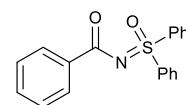

***N*-Benzoyl-*S,S*-di-4-chlorophenyl sulfoximine (3c)**

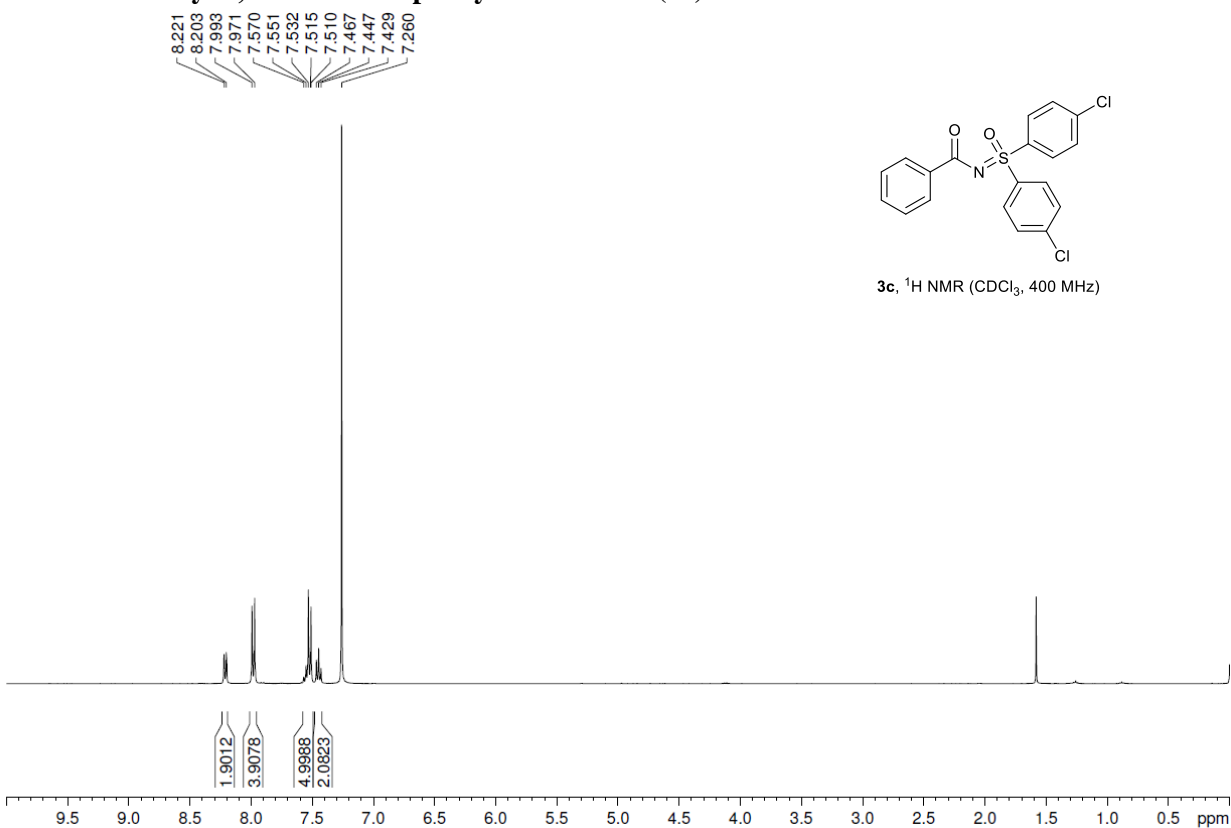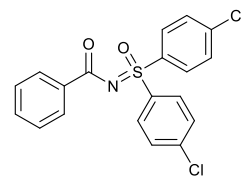

**3c, <sup>1</sup>H NMR (CDCl<sub>3</sub>, 400 MHz)**

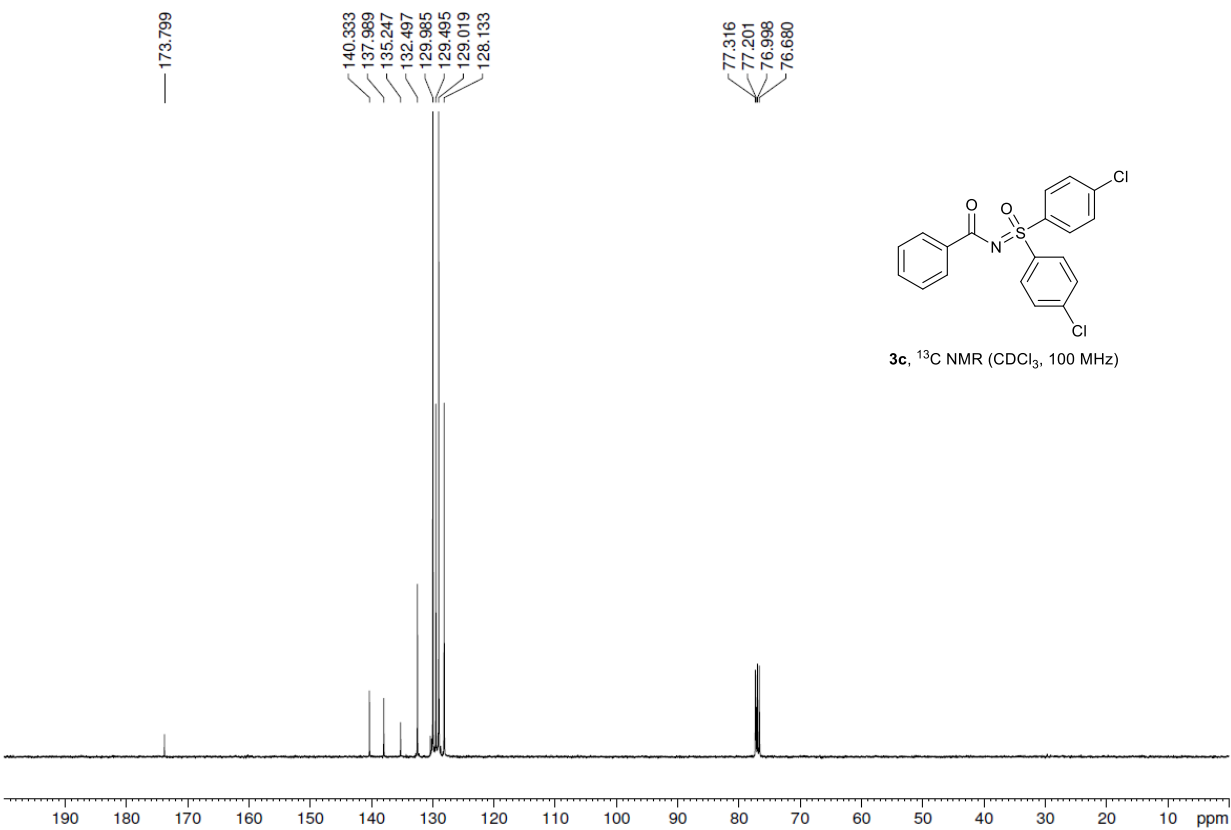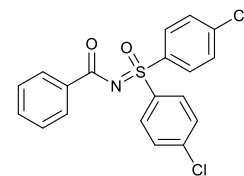

**3c, <sup>13</sup>C NMR (CDCl<sub>3</sub>, 100 MHz)**

### *N*-Benzoyl-*S*-(2-bromophenyl)-*S*-methyl sulfoximine (3d)

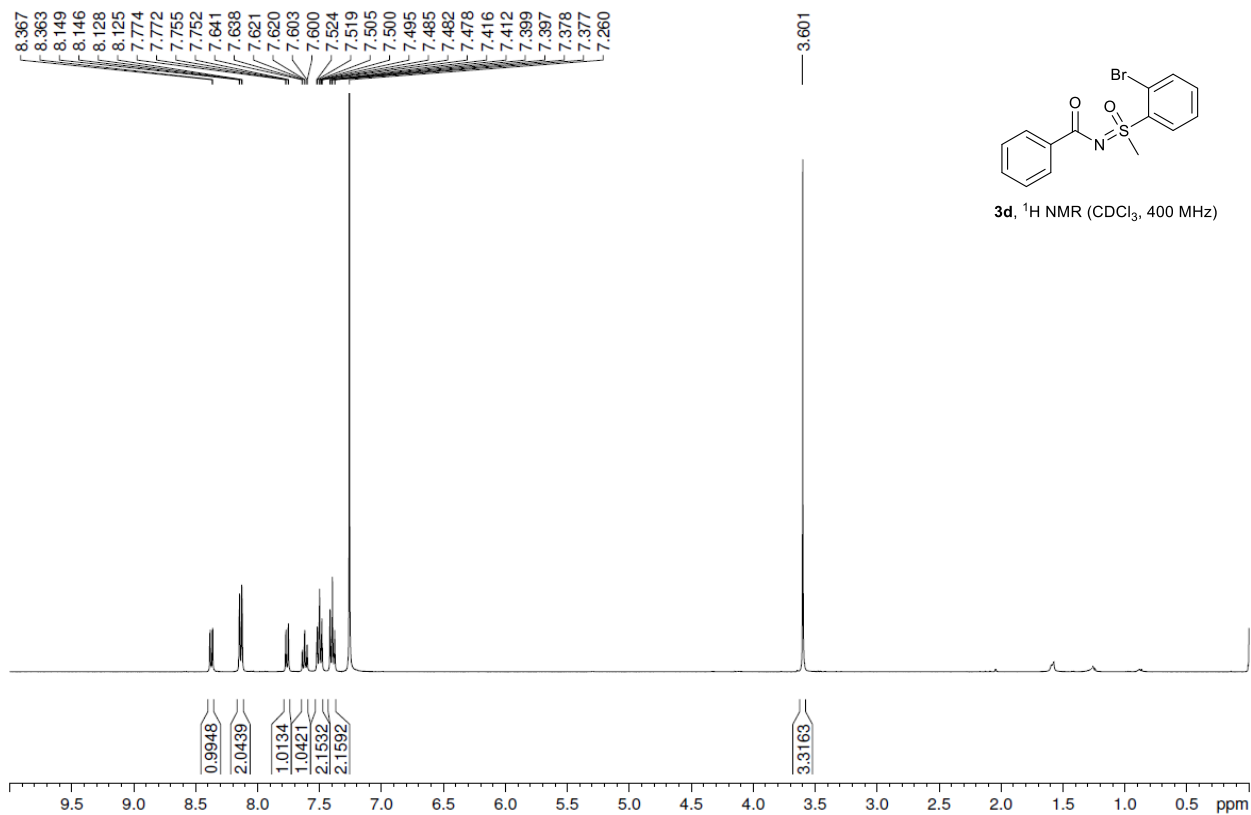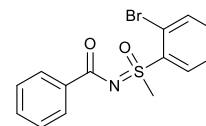

**3d, <sup>1</sup>H NMR (CDCl<sub>3</sub>, 400 MHz)**

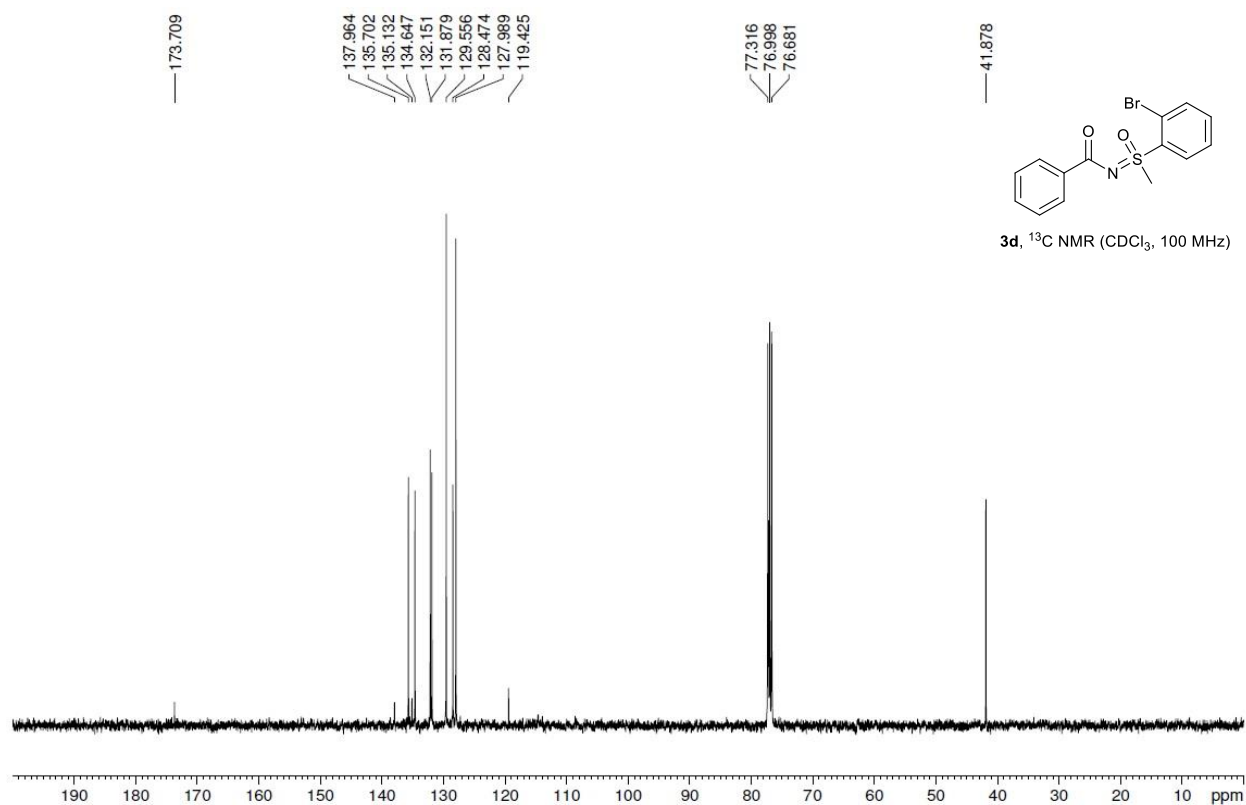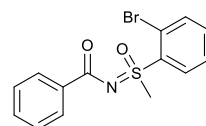

**3d, <sup>13</sup>C NMR (CDCl<sub>3</sub>, 100 MHz)**



**N-Benzoyl-S-benzyl-S-phenyl sulfoximine (3e)**

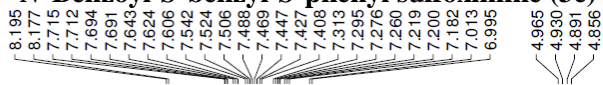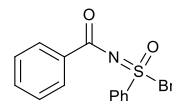

**3e**,  $^1\text{H}$  NMR ( $\text{CDCl}_3$ , 400 MHz)

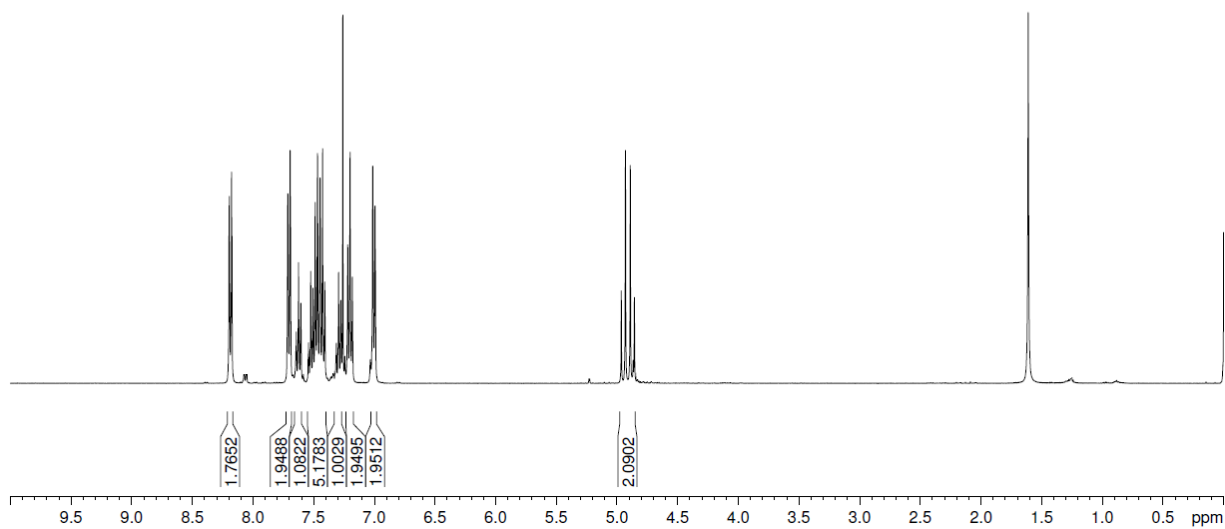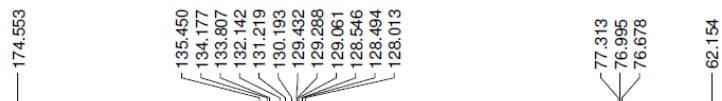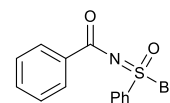

**3e**,  $^{13}\text{C}$  NMR ( $\text{CDCl}_3$ , 100 MHz)

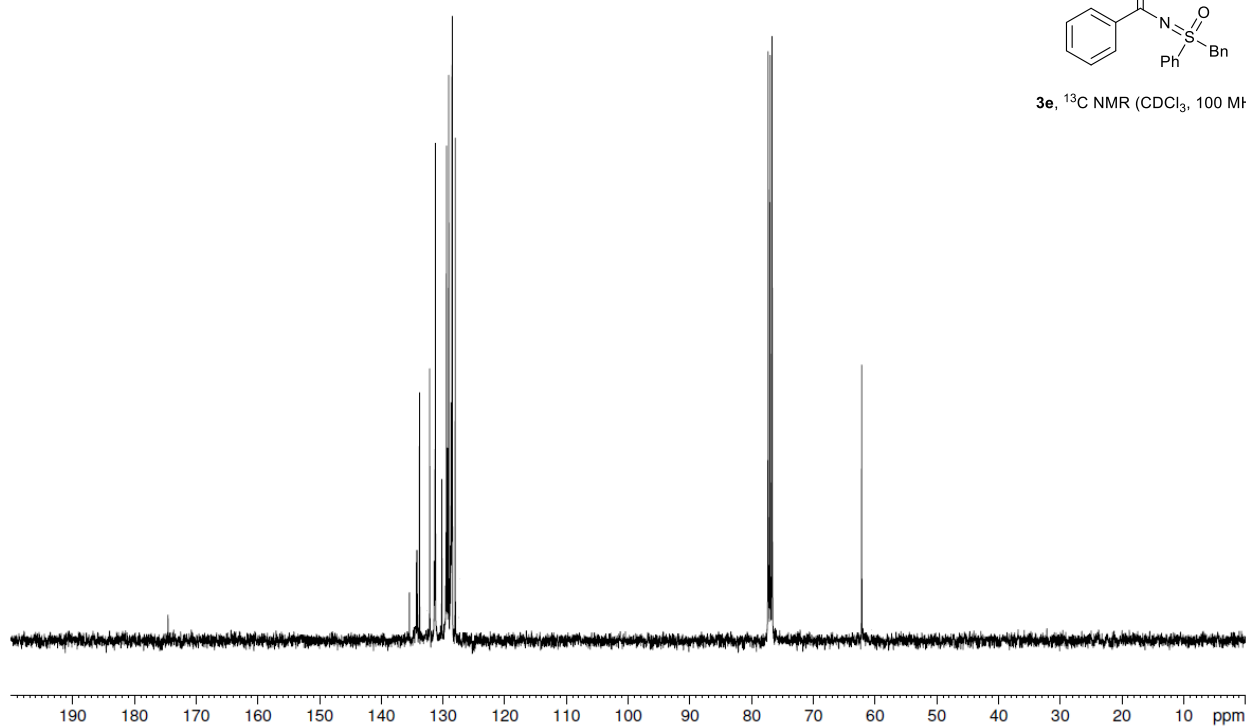

***N*-Benzoyl-*S,S*-dimethyl sulfoximine (3f)**

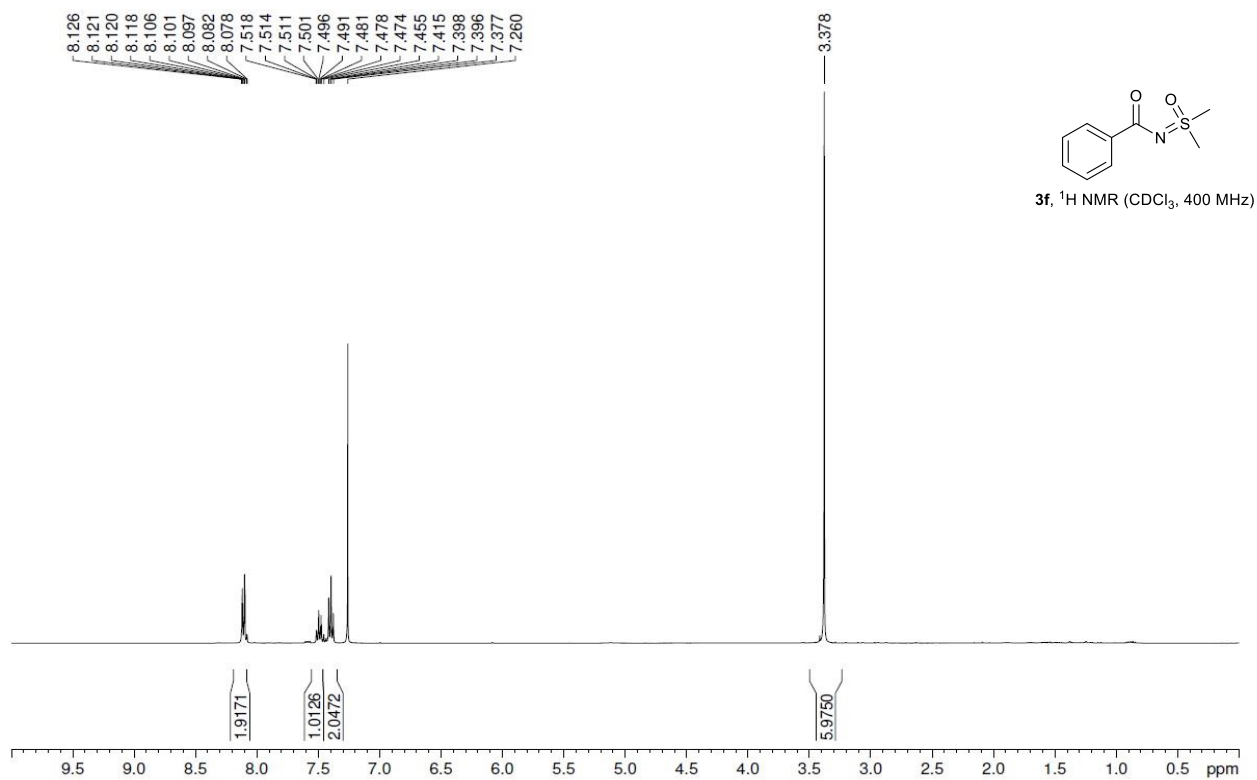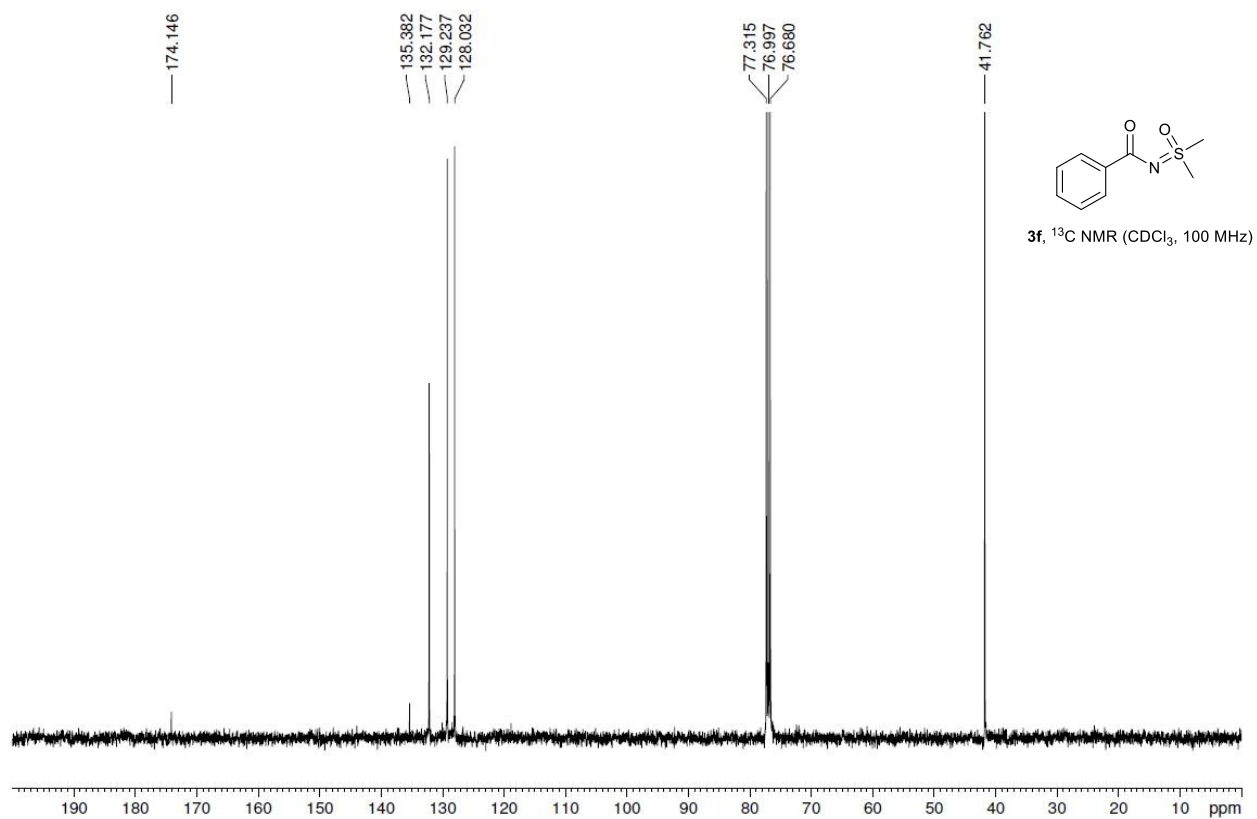

***N*-Benzoyl-*S,S*-tetramethylene sulfoximine (3g)**

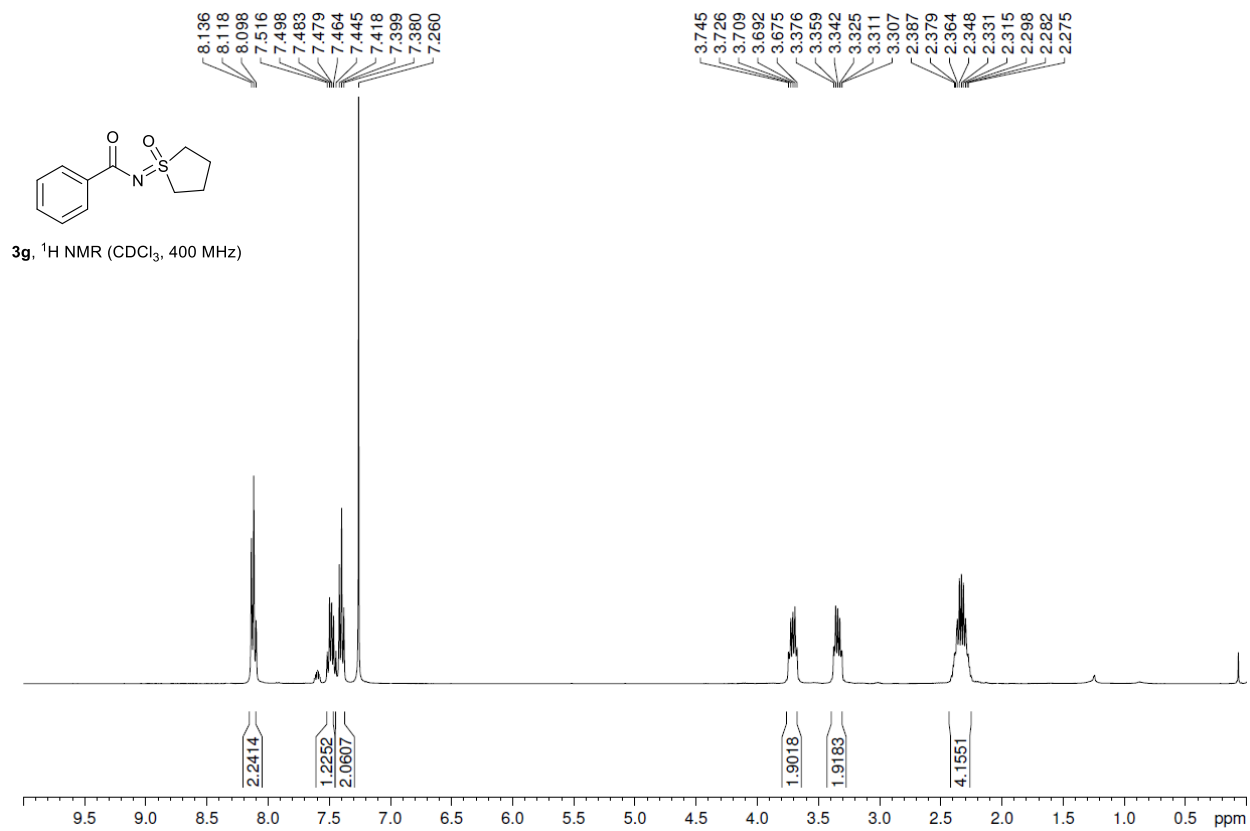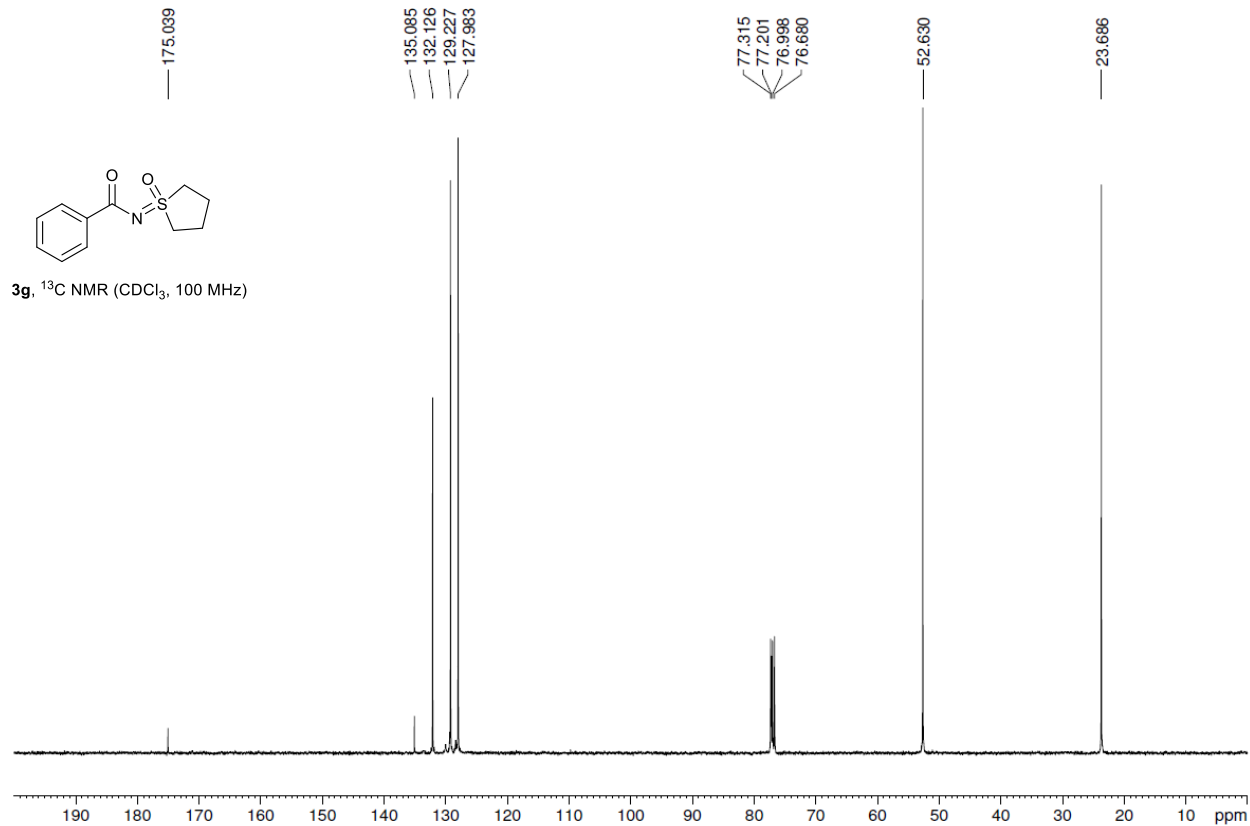

### *N*-Benzoyl-*S,S*-dibenzyl sulfoximine (**3h**)

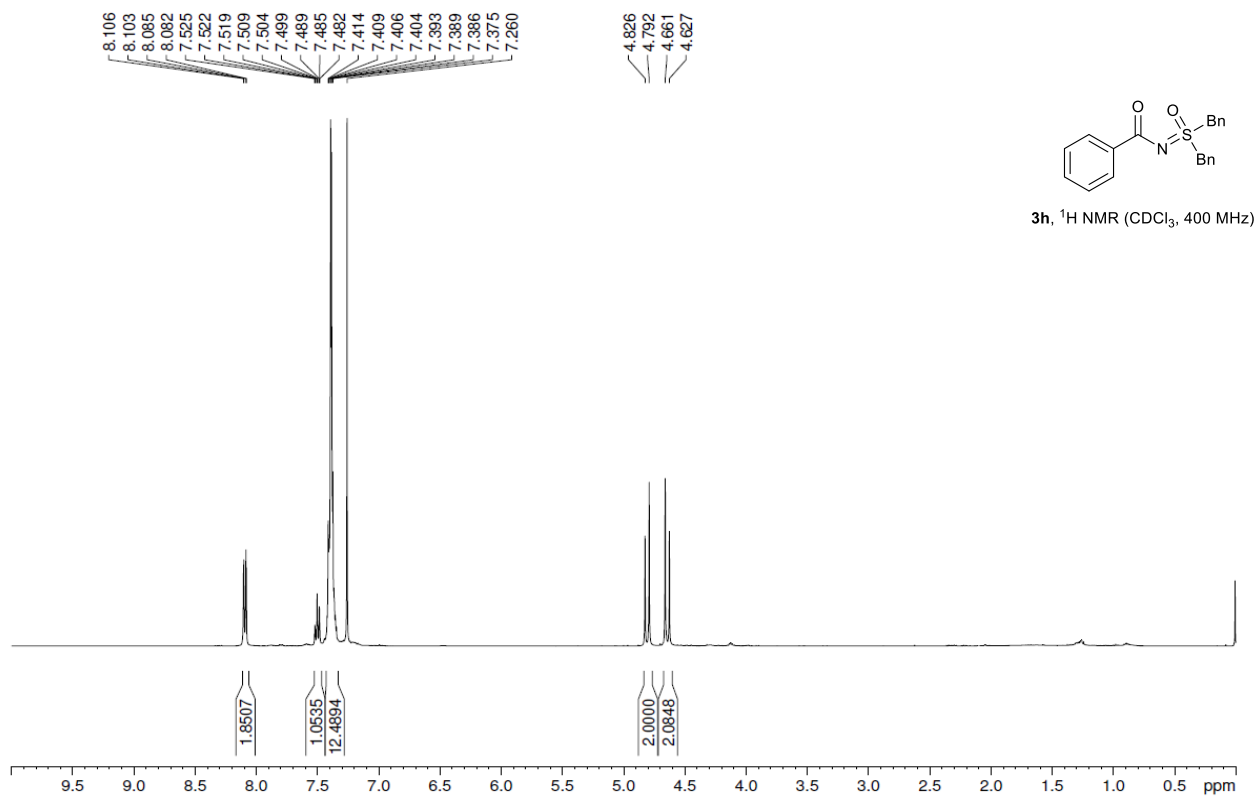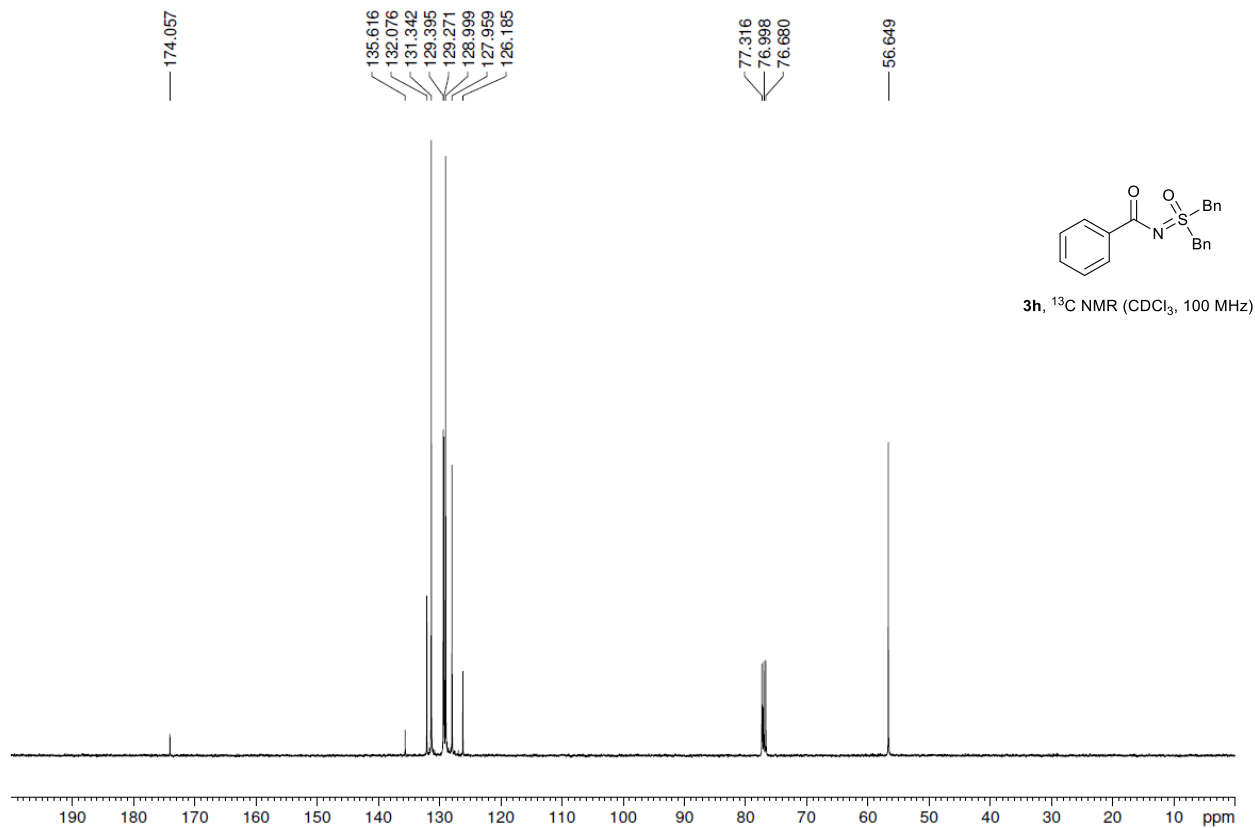

### *N*-Benzoyl-*S,S*-di-*n*-butyl sulfoximine (**3i**)

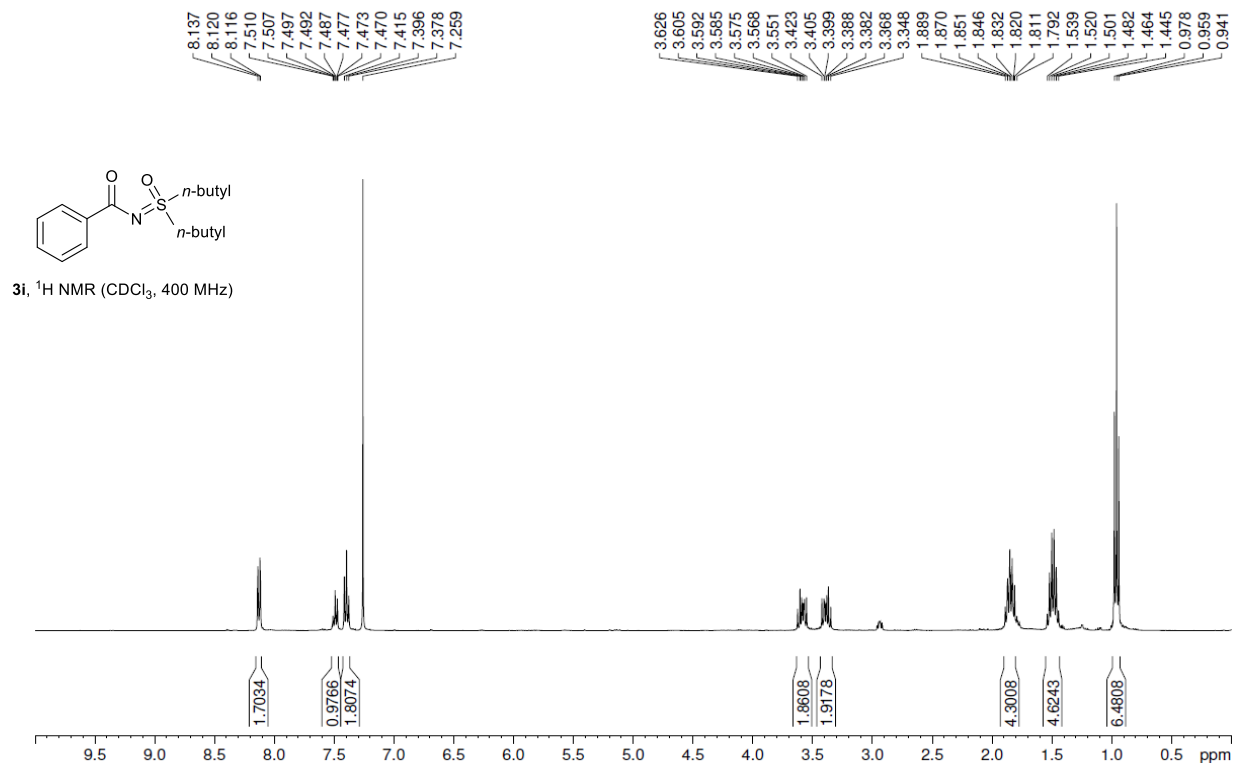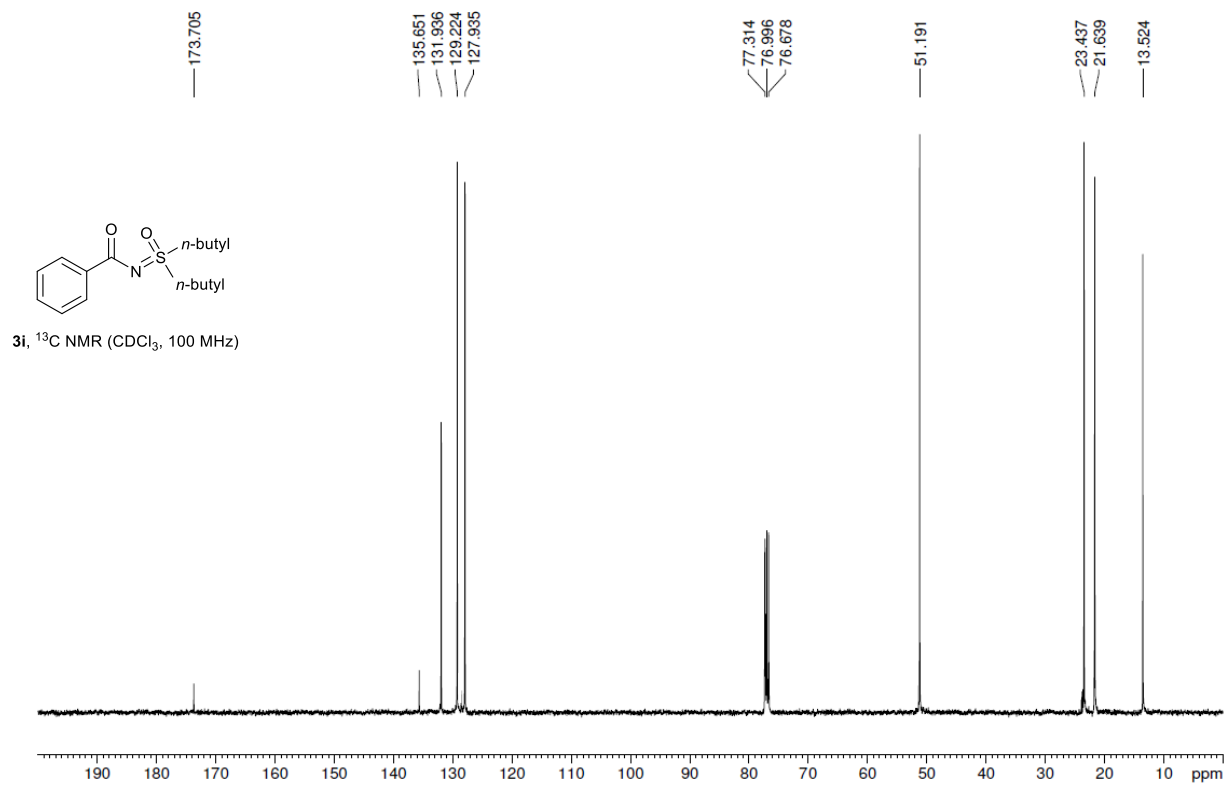

***N*-(4-Methylbenzoyl)-*S*-methyl-*S*-phenyl sulfoximine (4a)**

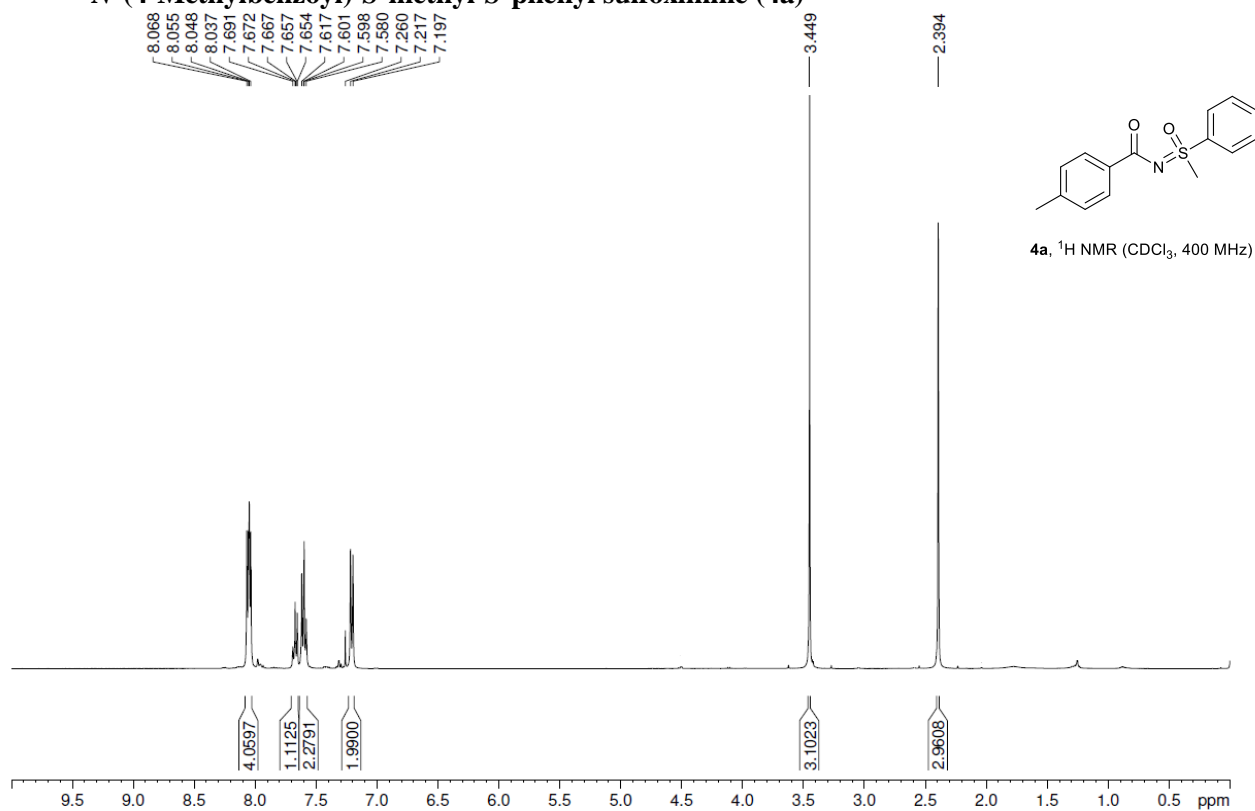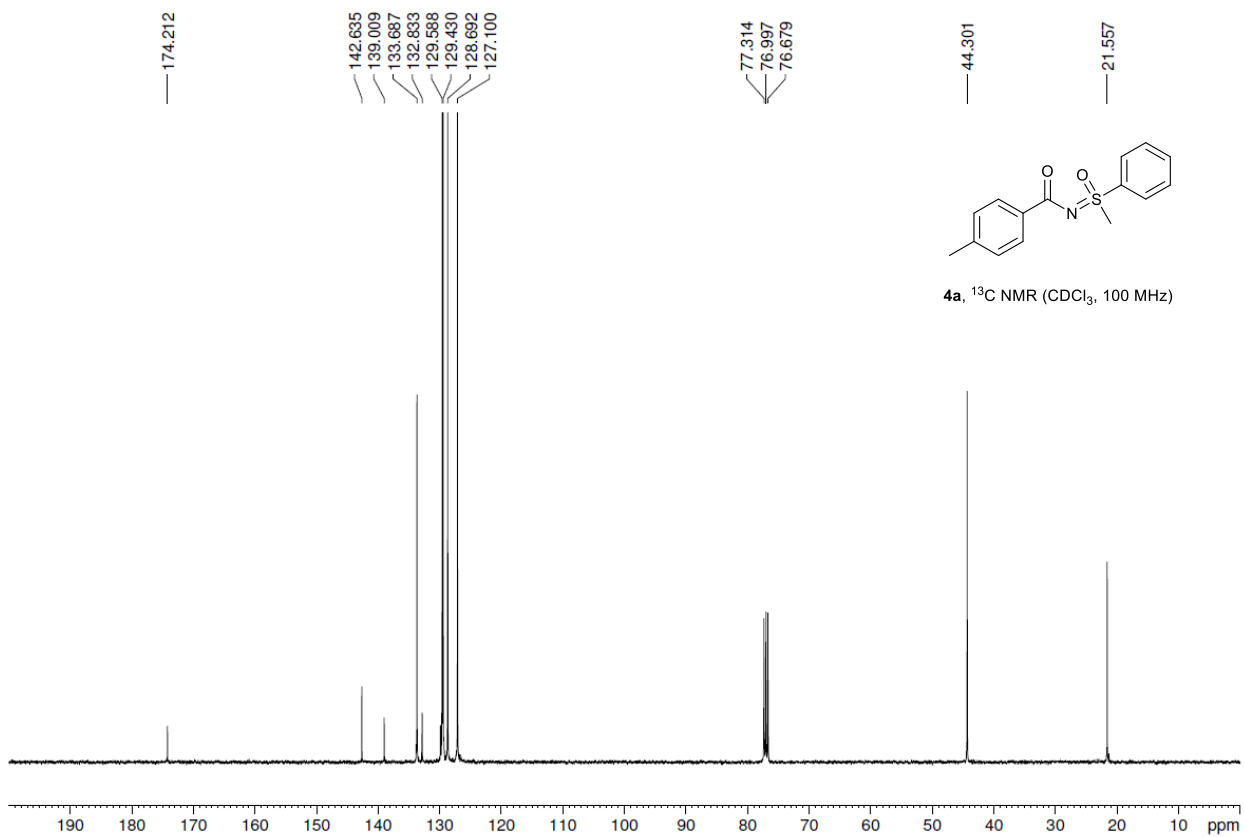

***N*-(4-Methylbenzoyl)-*S,S*-diphenyl sulfoximine (4b)**

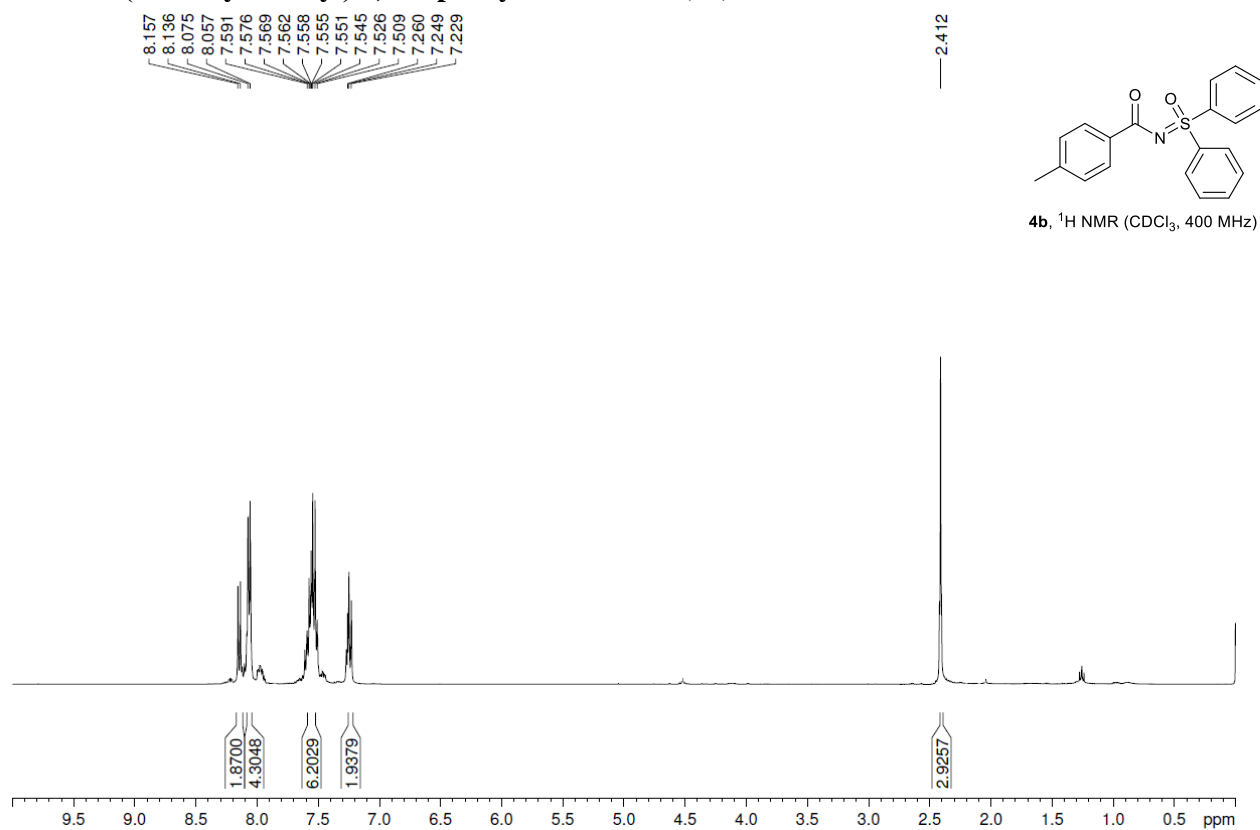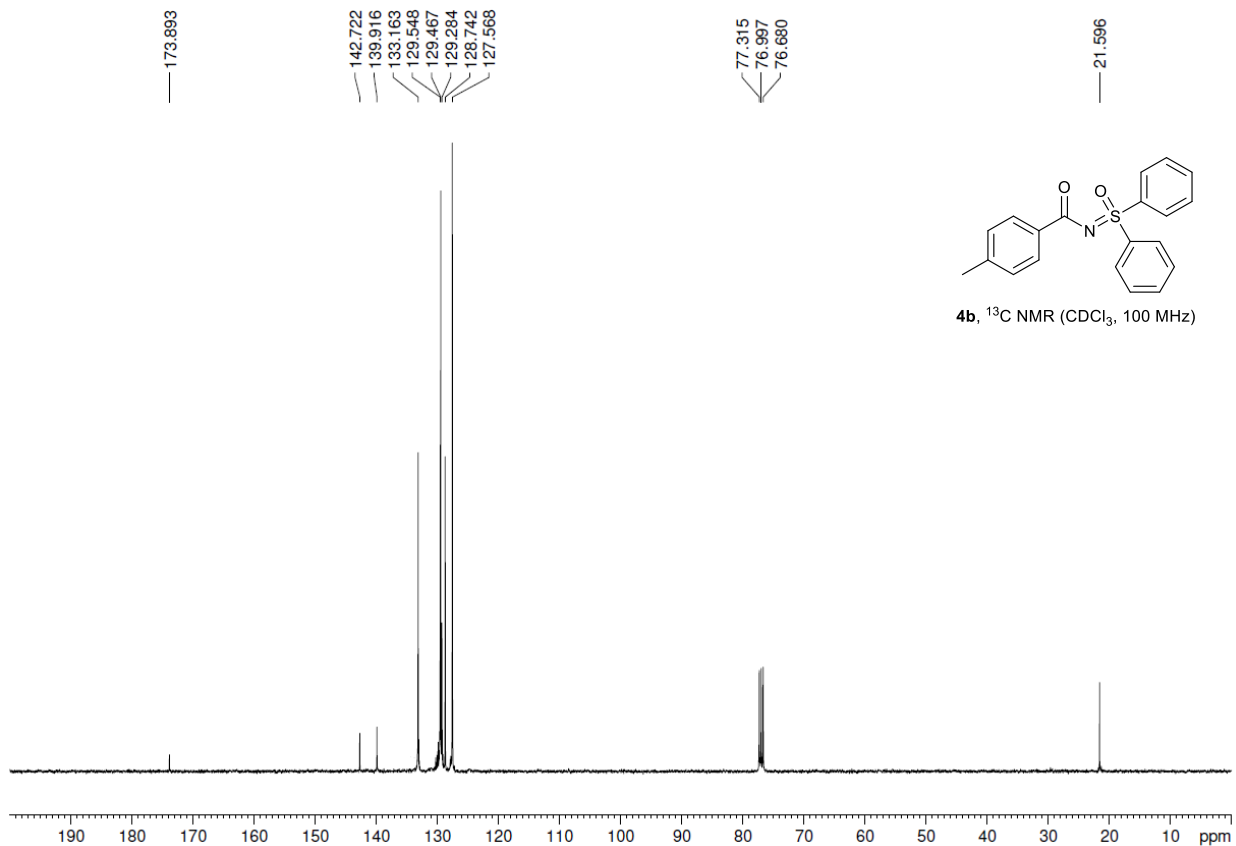

***N*-(4-Methylbenzoyl)-*S*-benzyl-*S*-phenyl sulfoximine (4c)**

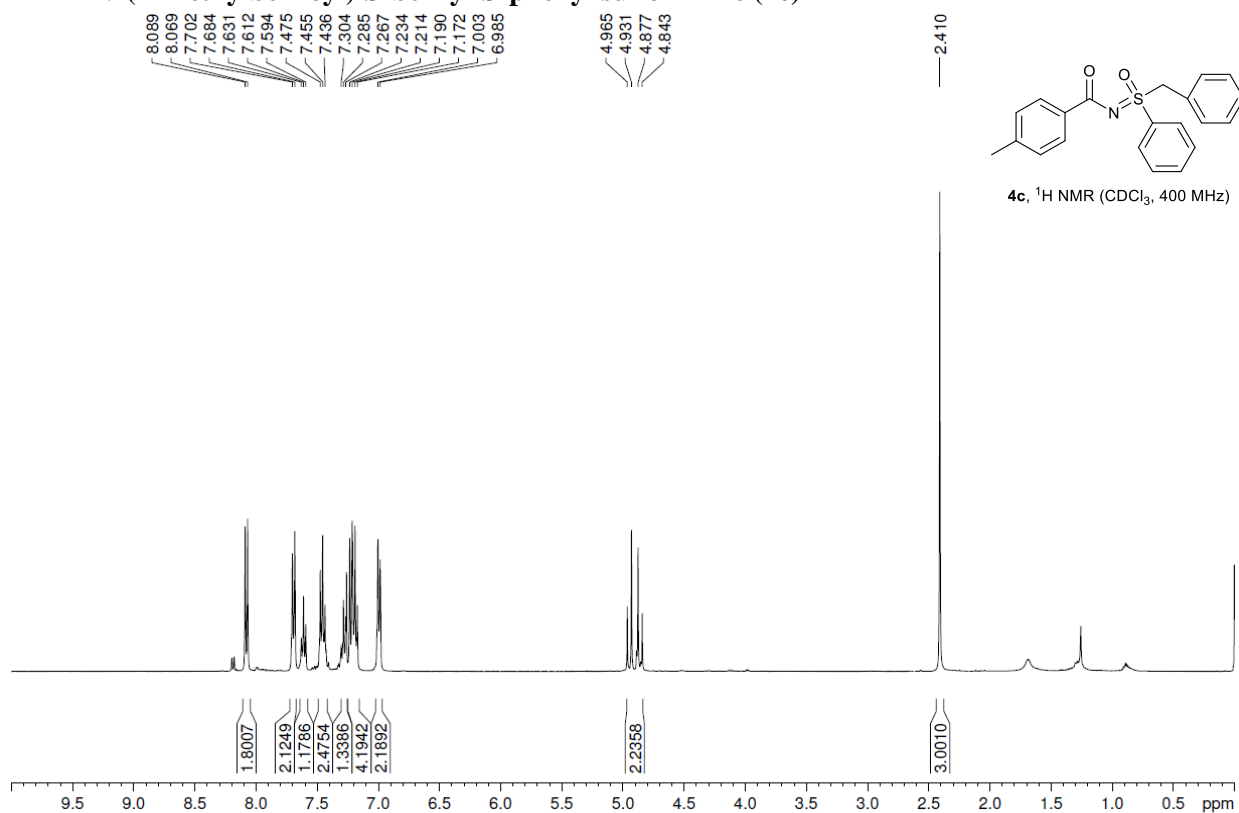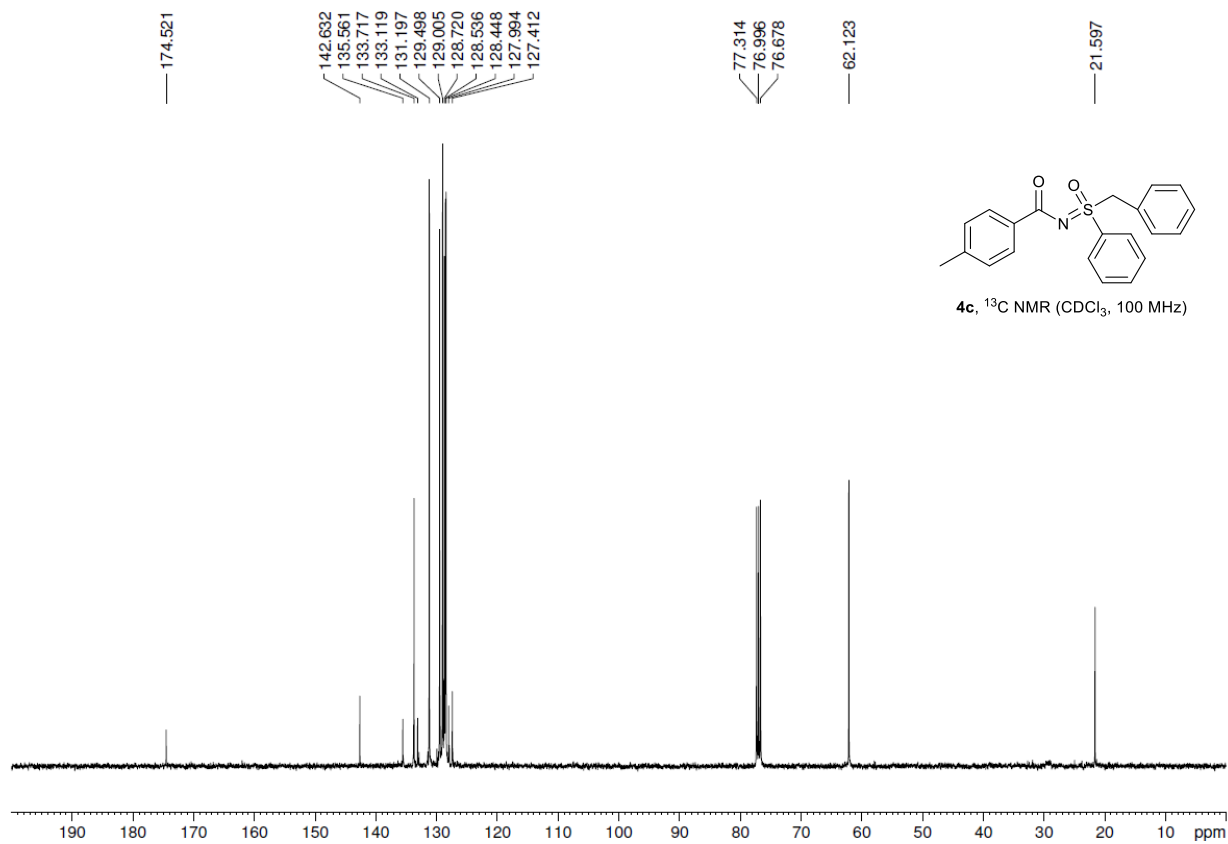



***N*-(4-Phenylbenzoyl)-*S,S*-diphenyl sulfoximine (4d)**

8.331  
8.310  
8.105  
8.103  
8.085  
8.081  
7.883  
7.861  
7.838  
7.599  
7.592  
7.585  
7.582  
7.578  
7.569  
7.550  
7.533  
7.490  
7.472  
7.453  
7.407  
7.389  
7.370  
7.260

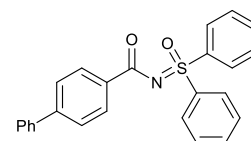

**4d**,  $^1\text{H}$  NMR ( $\text{CDCl}_3$ , 400 MHz)

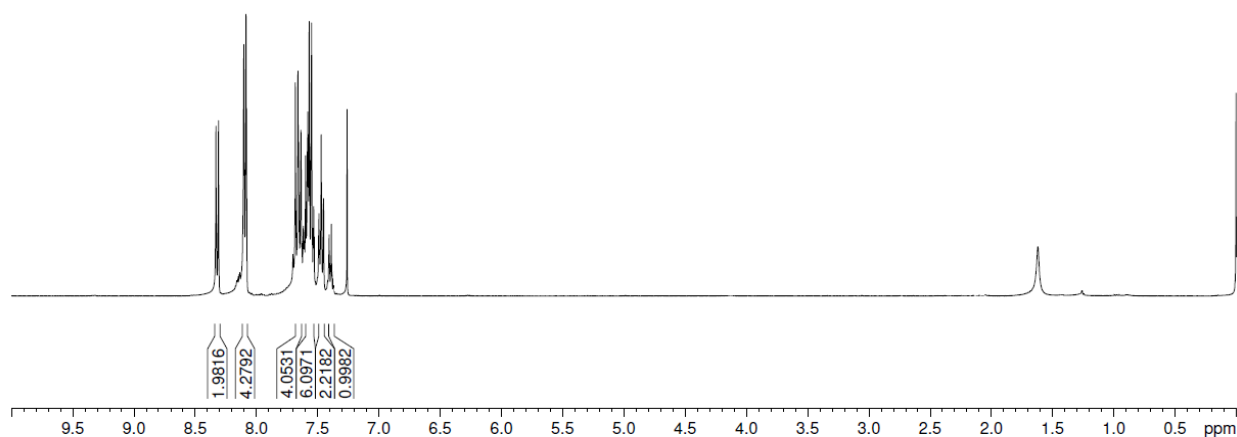

173.724  
144.943  
140.436  
139.930  
133.873  
133.300  
130.091  
129.576  
128.886  
127.911  
127.672  
127.307  
126.832  
77.352  
77.035  
76.717

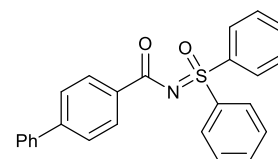

**4d**,  $^{13}\text{C}$  NMR ( $\text{CDCl}_3$ , 100 MHz)

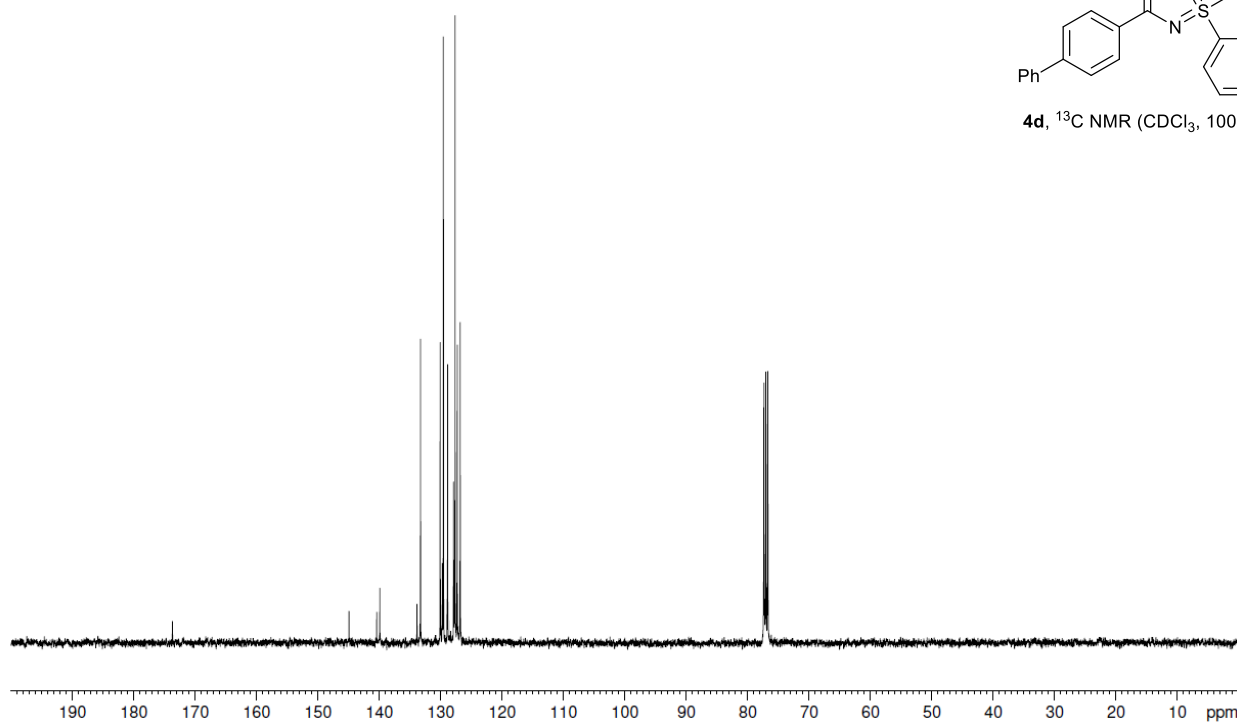

***N*-(4-Chlorobenzoyl)-*S,S*-diphenyl sulfoximine (4e).**

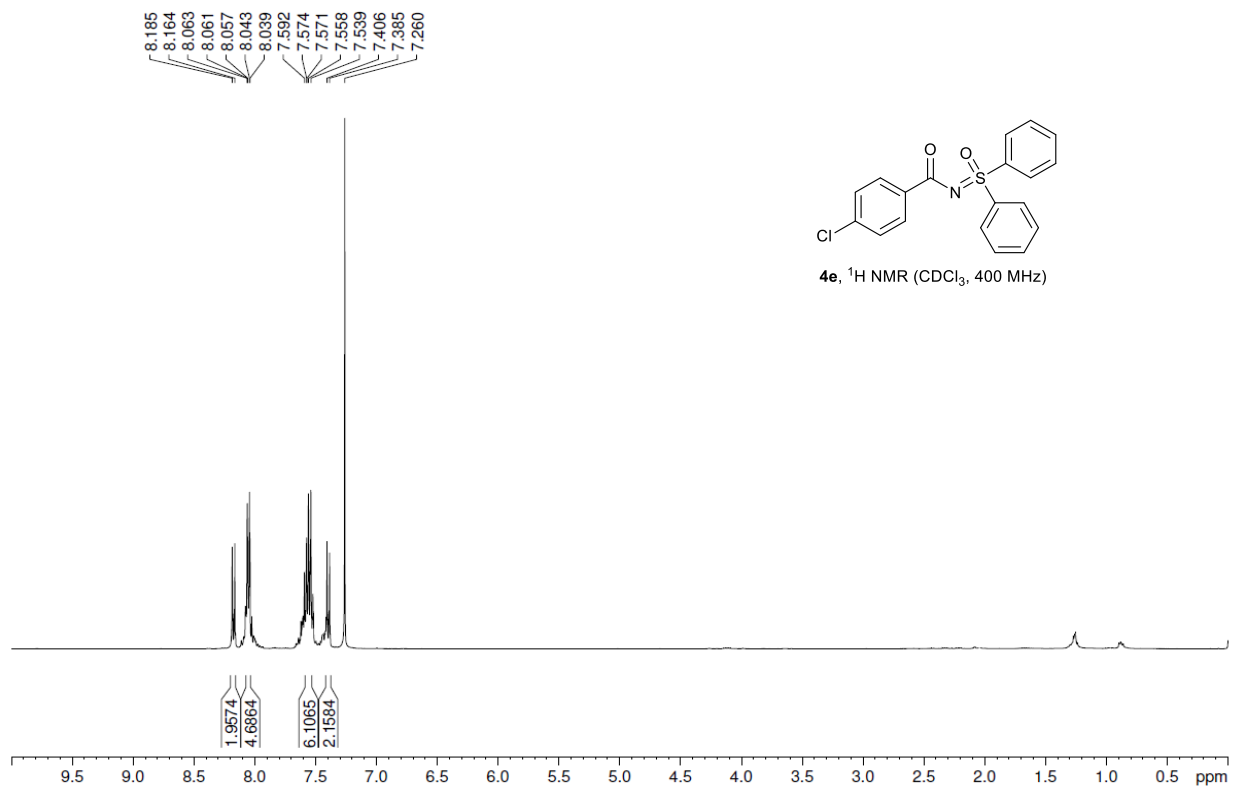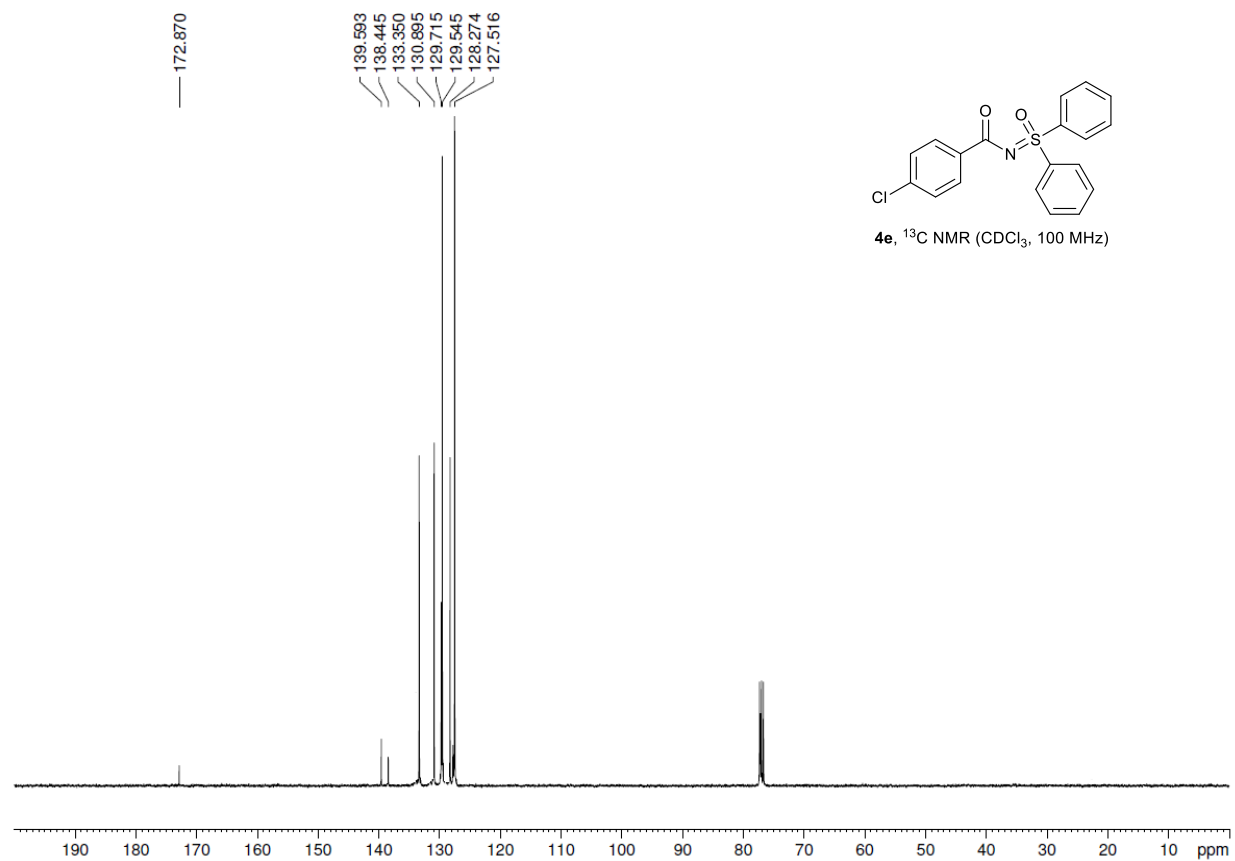

***N*-(4-Bromobenzoyl)-*S,S*-diphenyl sulfoximine (4f)**

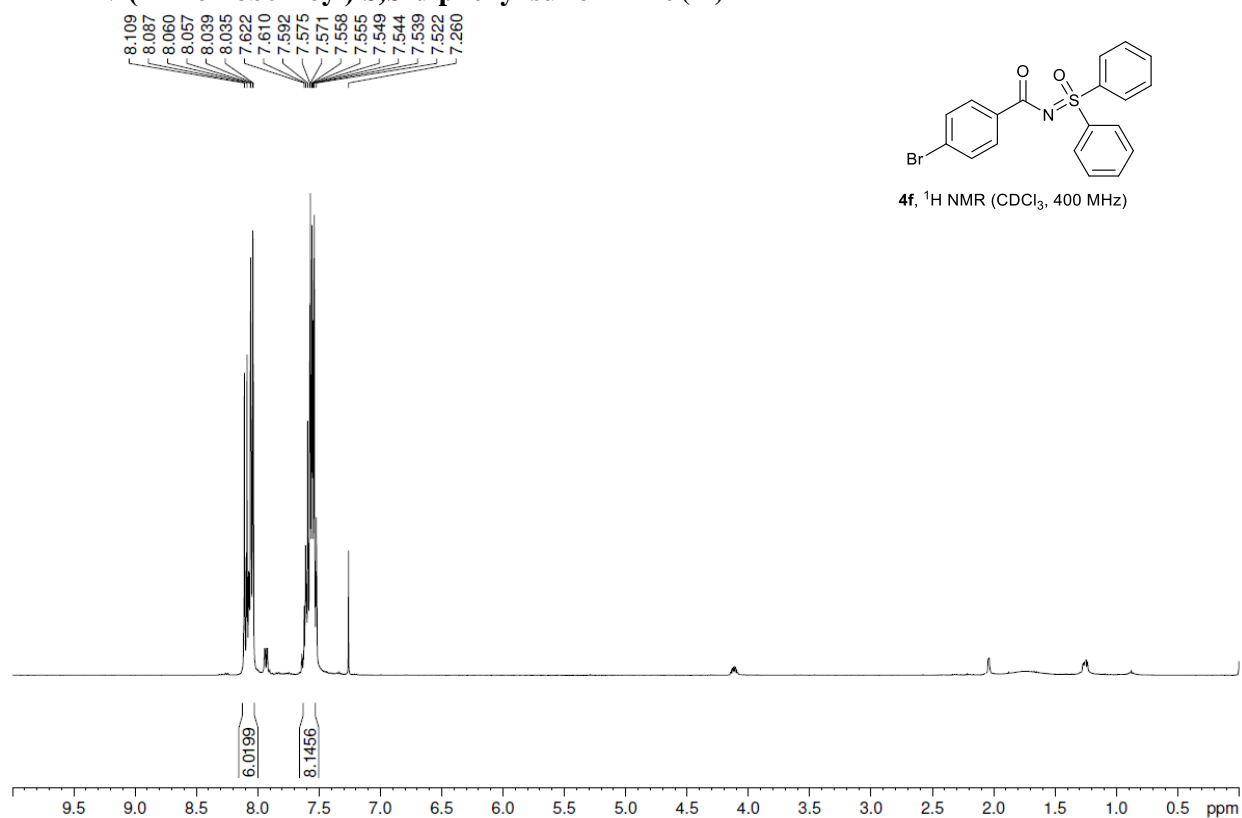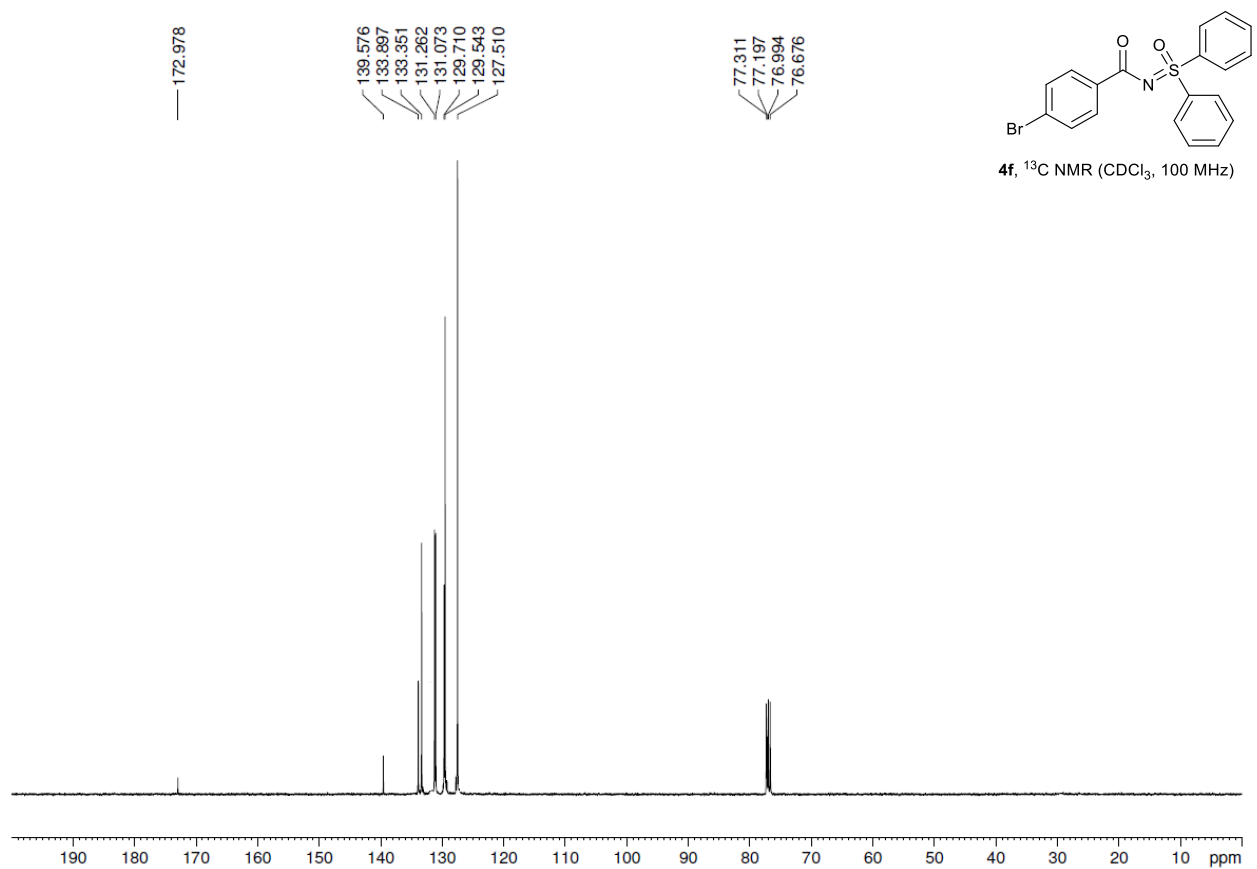

***N*-(4-Methoxybenzoyl)-*S,S*-diphenyl sulfoximine (4g)**

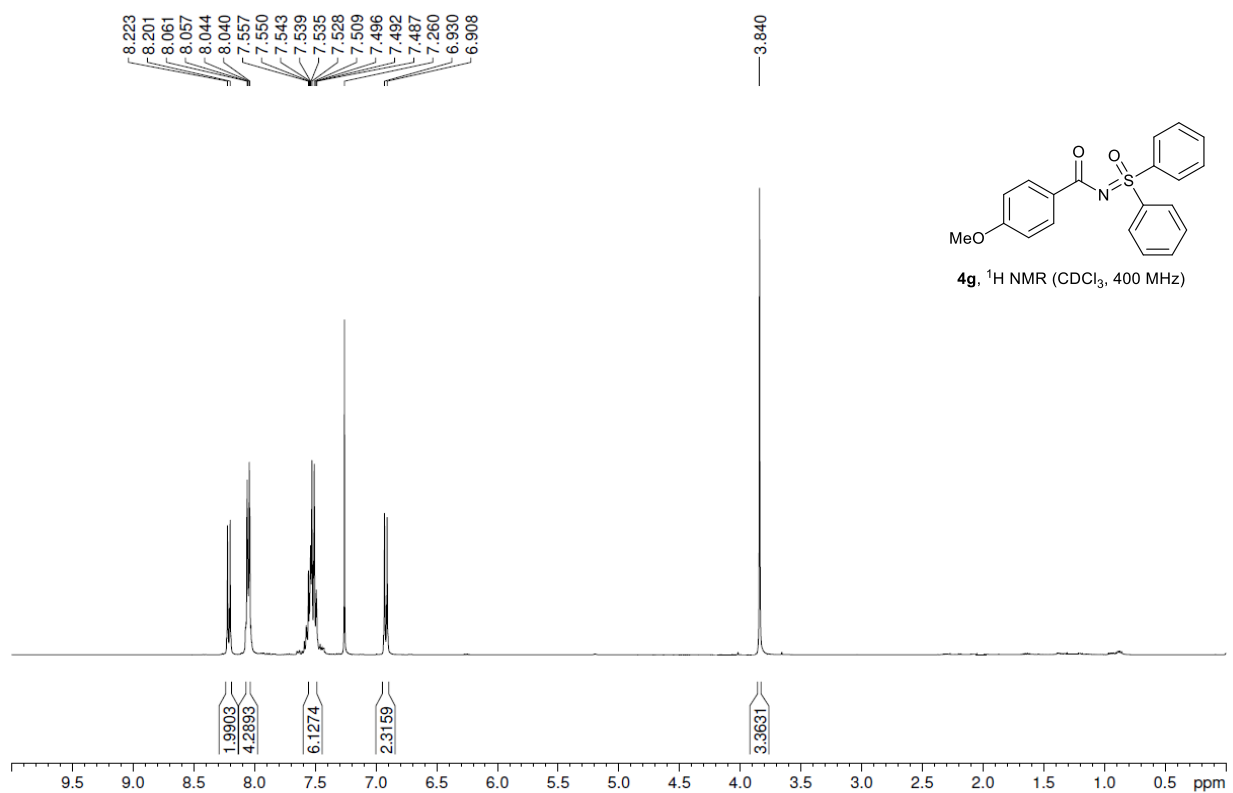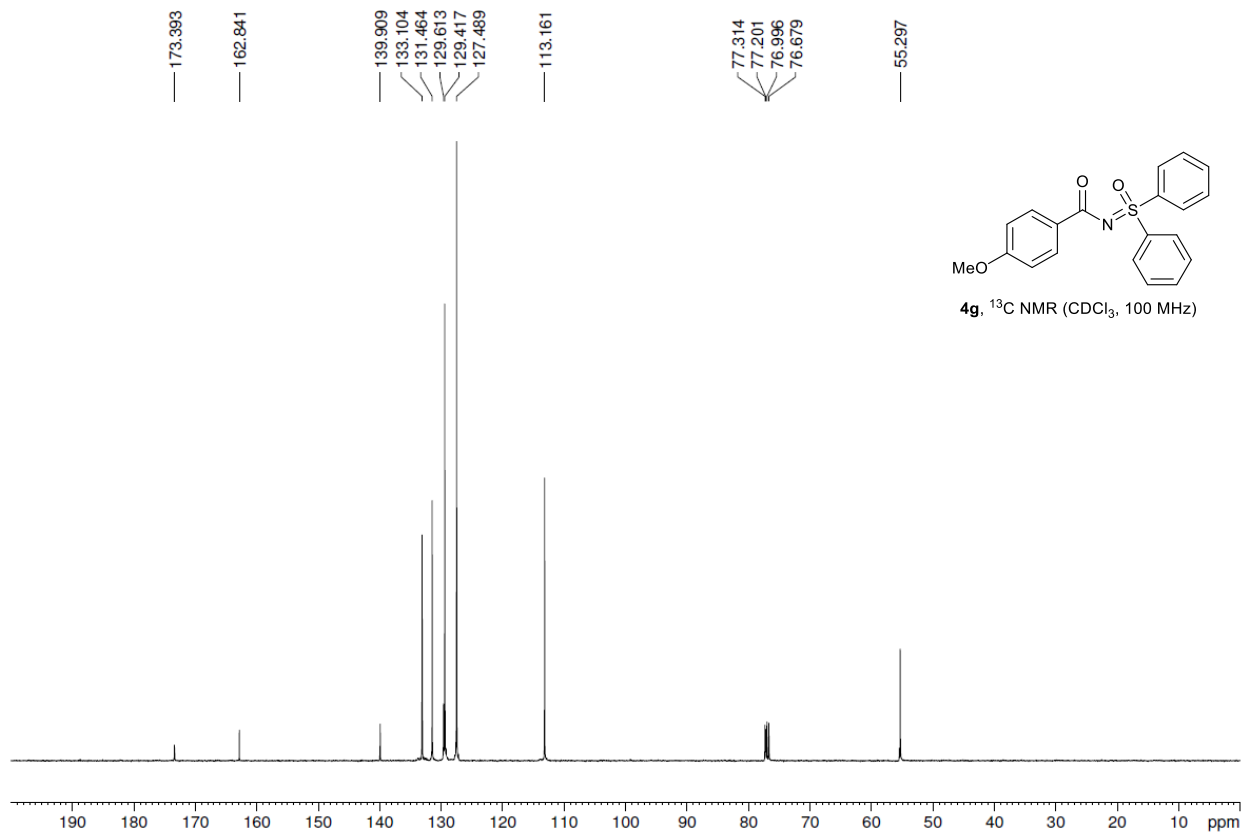

### *N*-(4-Nitrobenzoyl)-*S,S*-diphenyl sulfoximine (**4h**)

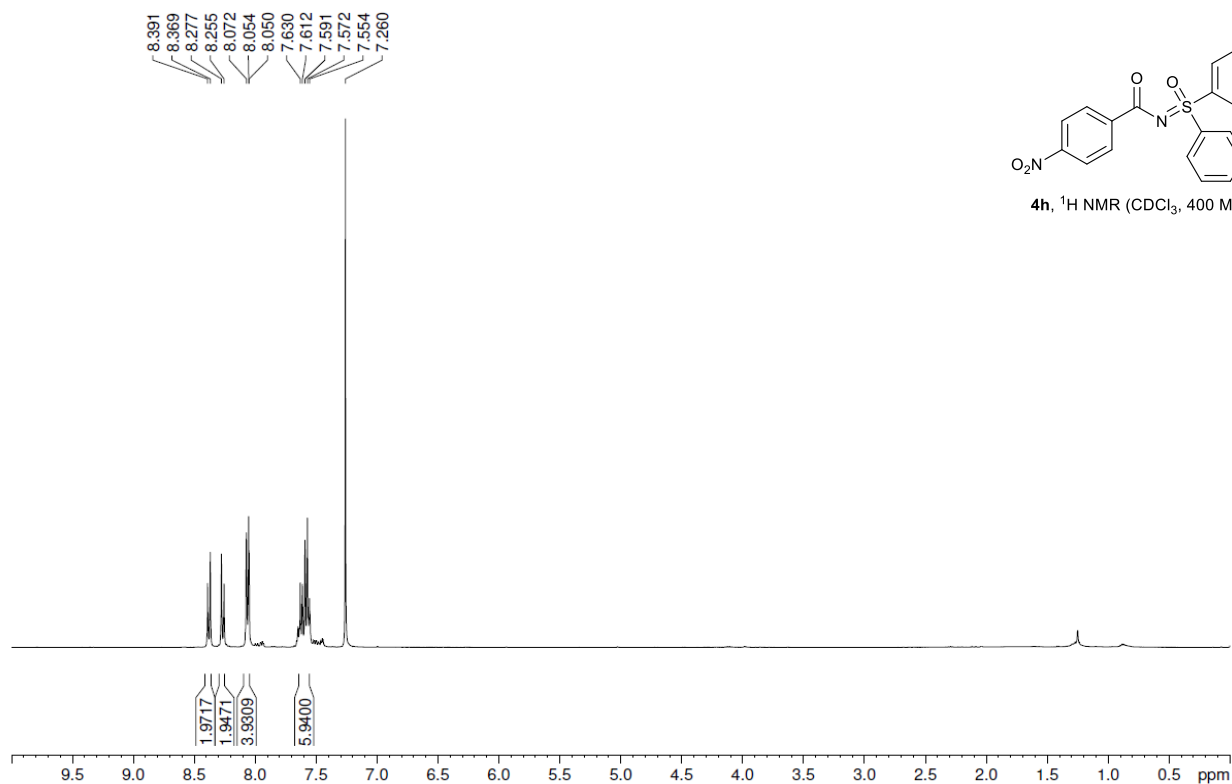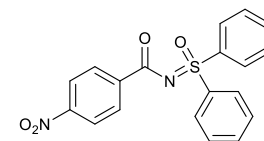

**4h**, <sup>1</sup>H NMR (CDCl<sub>3</sub>, 400 MHz)

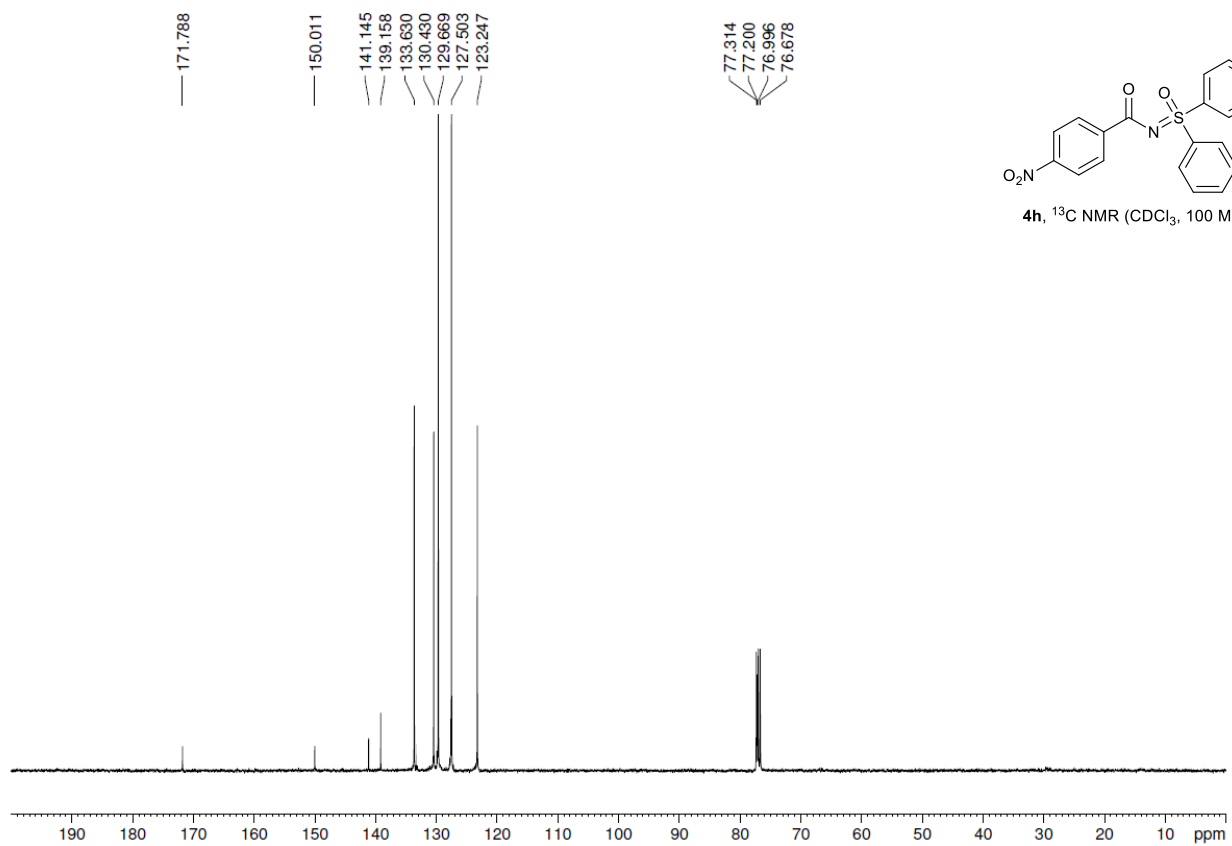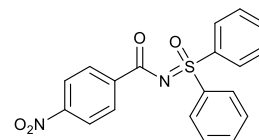

**4h**, <sup>13</sup>C NMR (CDCl<sub>3</sub>, 100 MHz)

***N*-(3-Bromobenzoyl)-*S,S*-diphenyl sulfoximine (4i)**

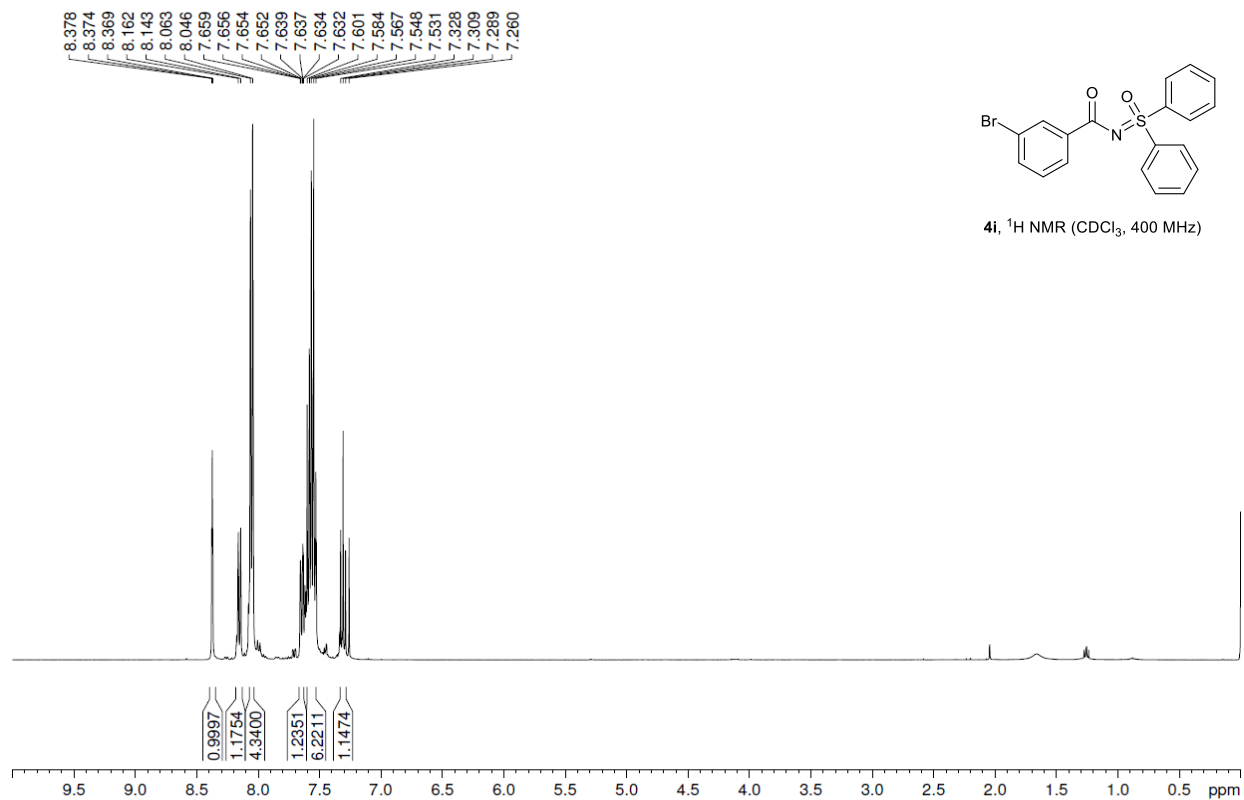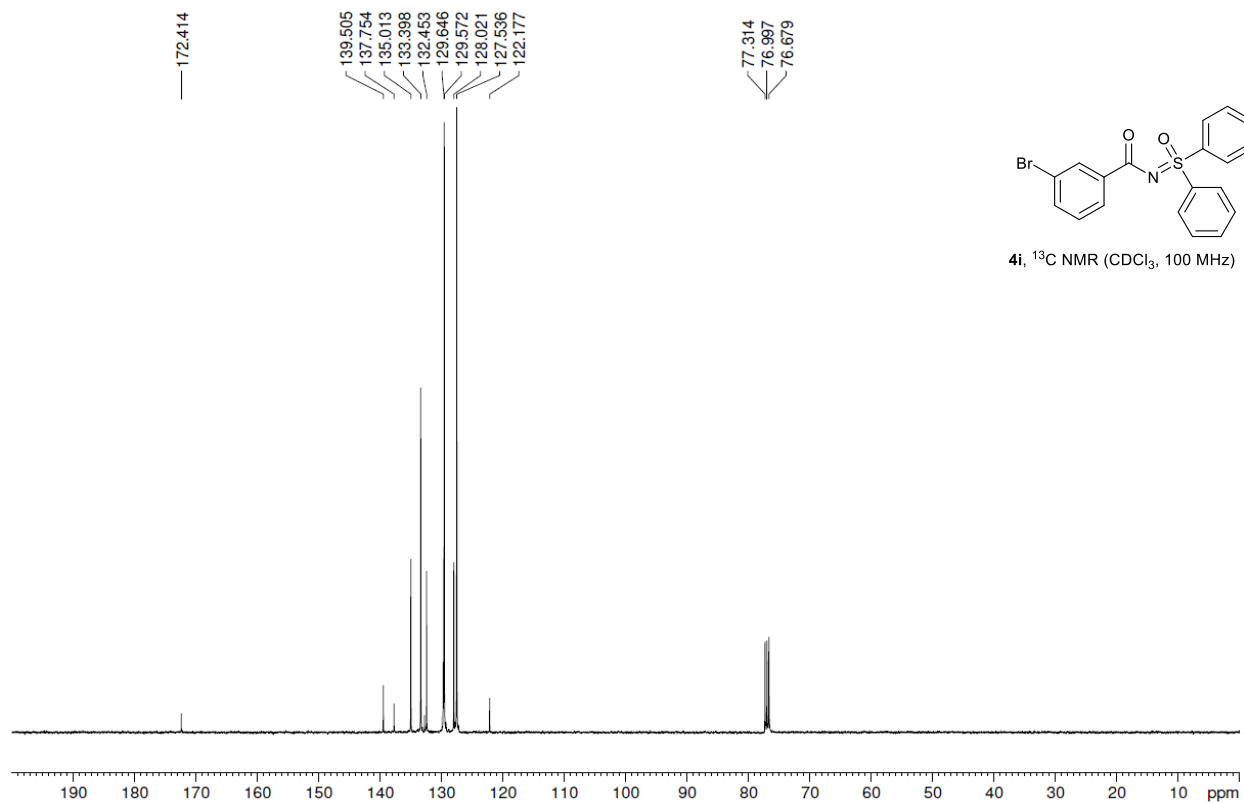

***N*-(3-Methoxybenzoyl)-*S,S*-diphenyl sulfoximine (4j)**

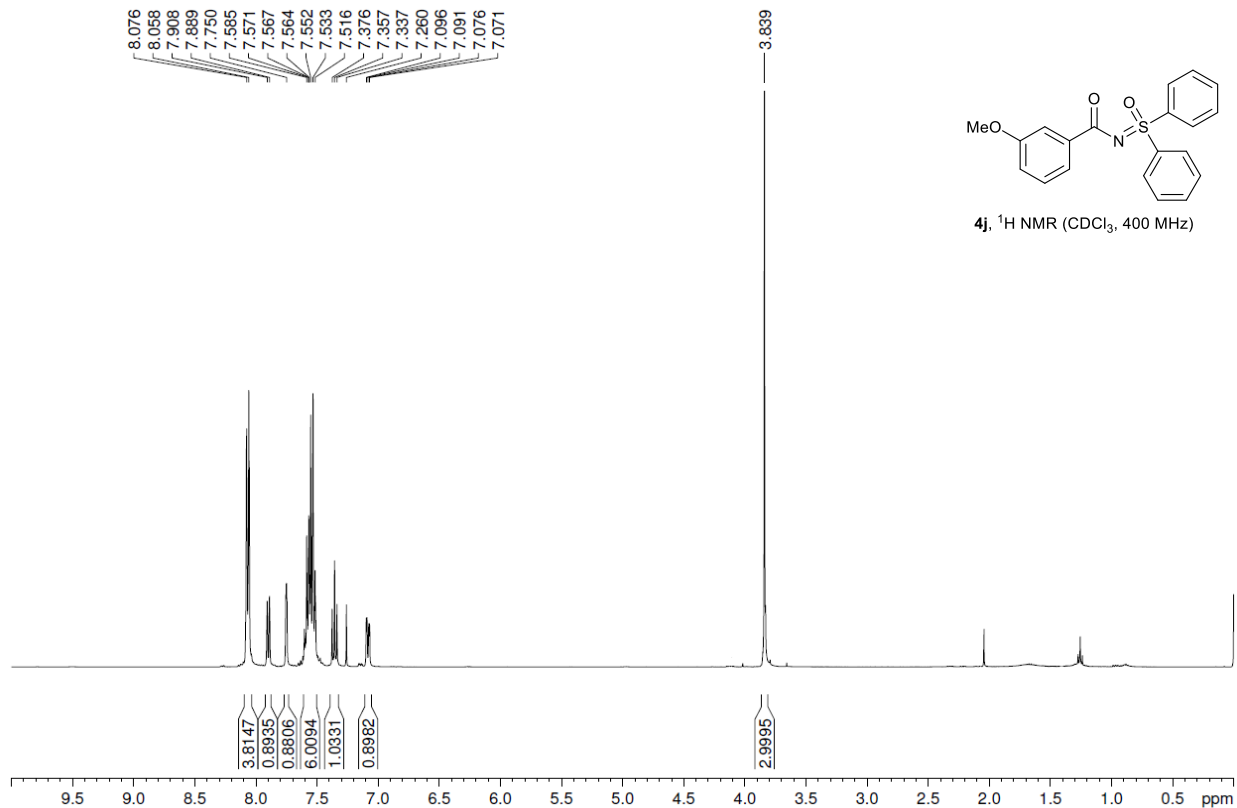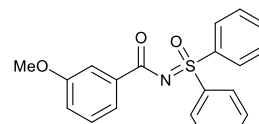

**4j, <sup>1</sup>H NMR (CDCl<sub>3</sub>, 400 MHz)**

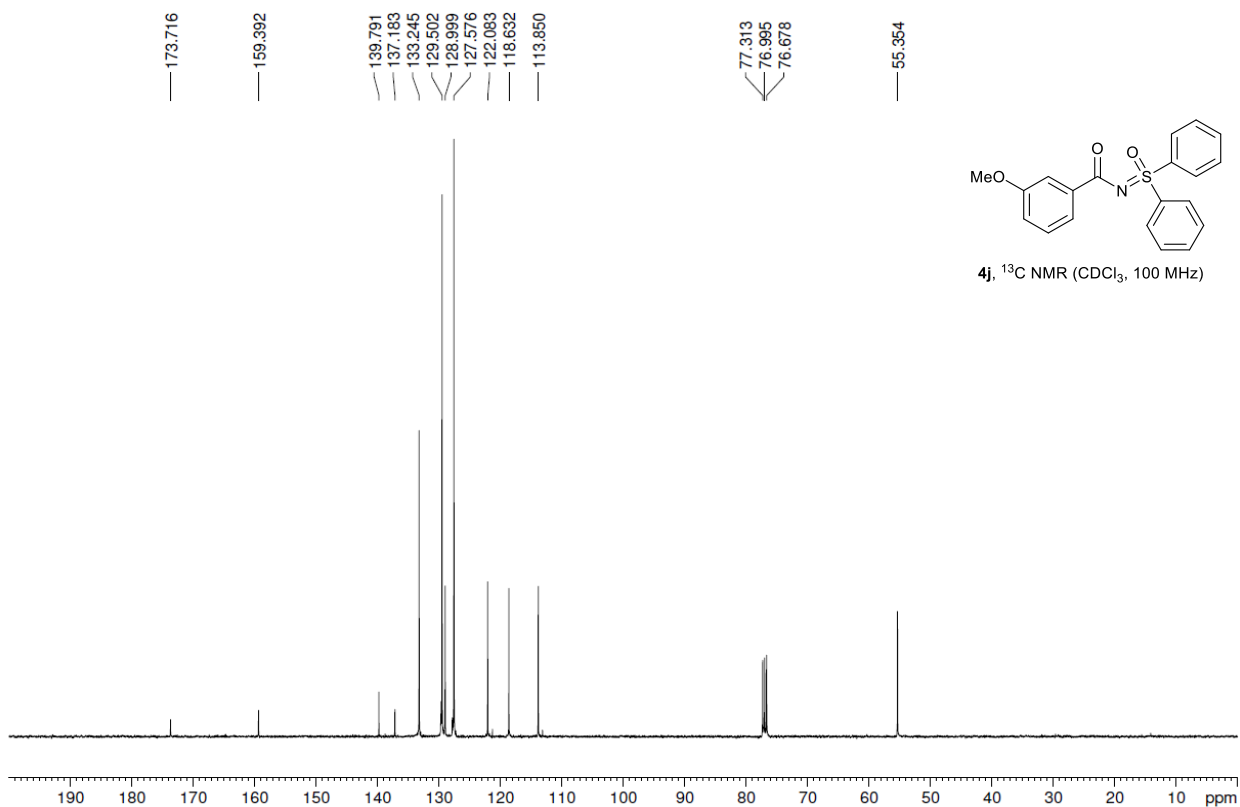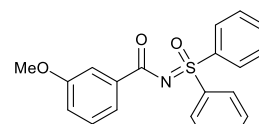

**4j, <sup>13</sup>C NMR (CDCl<sub>3</sub>, 100 MHz)**

***N*-(2,4,6-Trimethylbenzoyl)-*S,S*-diphenyl sulfoximine (4k)**

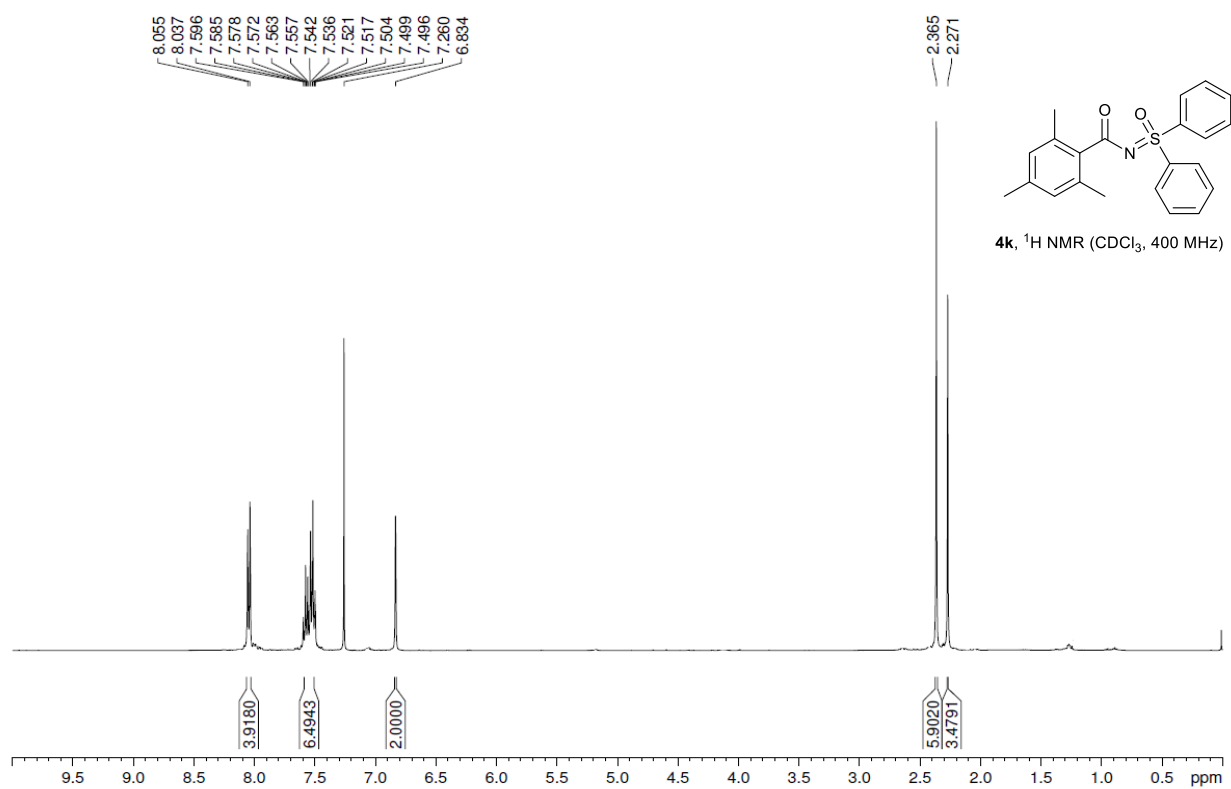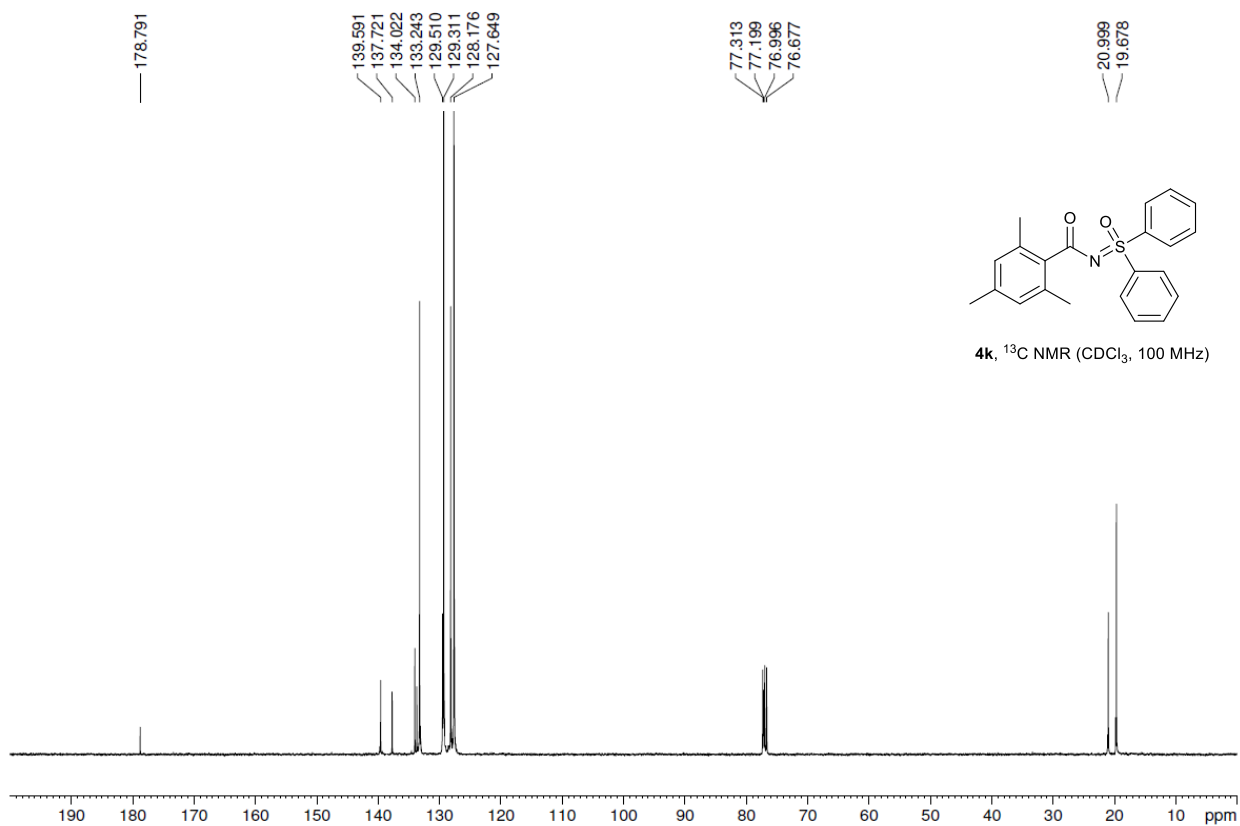



***N*-(2-Naphthoyl)-*S,S*-diphenyl sulfoximine (4I)**

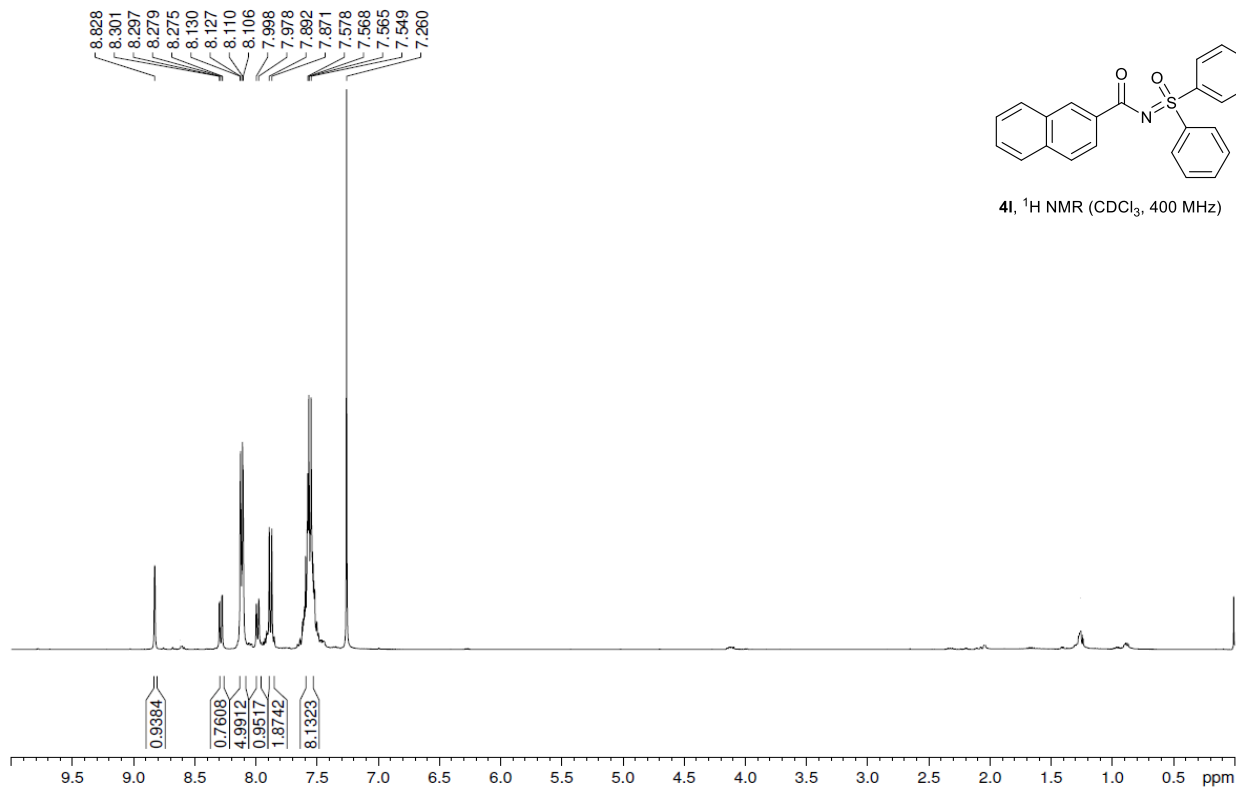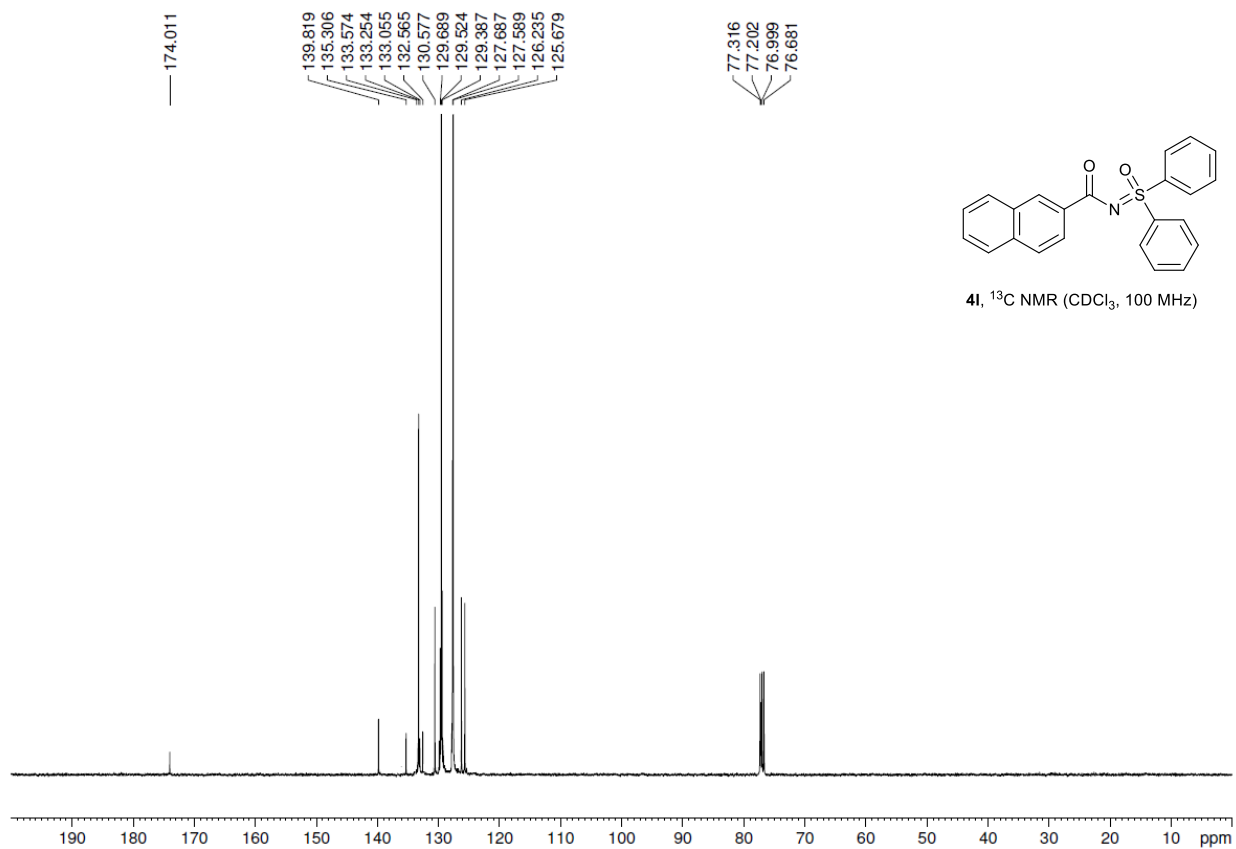

***N*-(Thiophene-2-carbonyl)-*S,S*-diphenyl sulfoximine (4m)**

8.063  
8.046  
7.857  
7.854  
7.848  
7.845  
7.602  
7.599  
7.584  
7.569  
7.566  
7.562  
7.549  
7.530  
7.513  
7.508  
7.505  
7.495  
7.492  
7.260  
7.097  
7.088  
7.085  
7.075

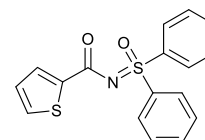

**4m**,  $^1\text{H}$  NMR ( $\text{CDCl}_3$ , 400 MHz)

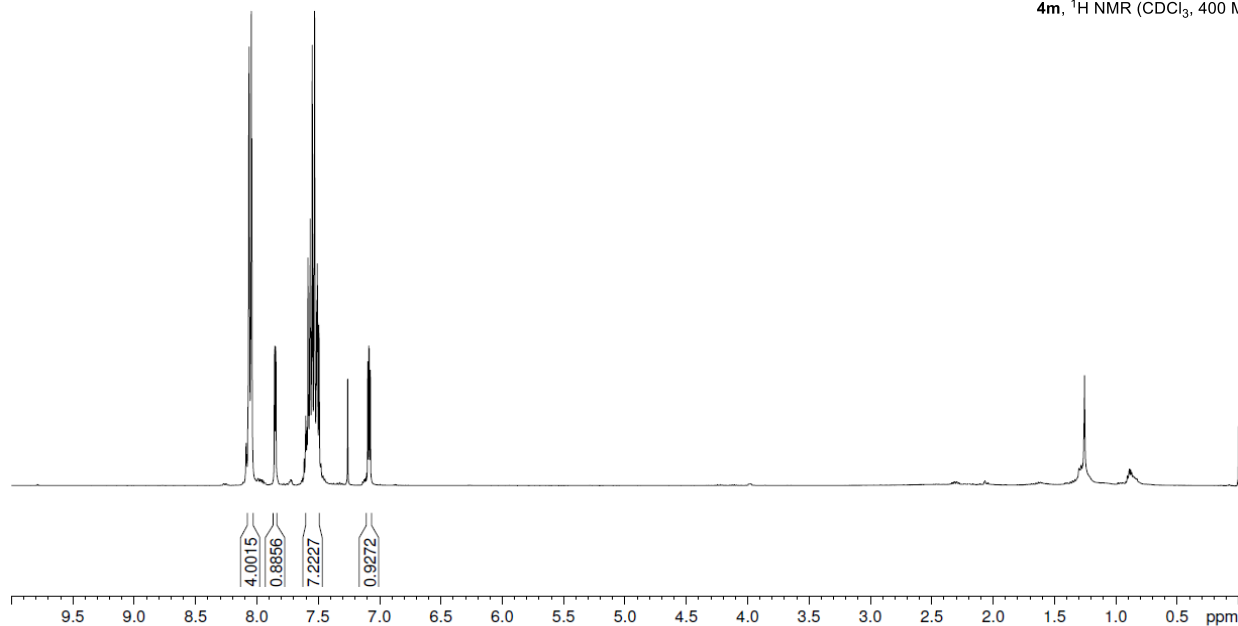

168.436  
139.567  
133.824  
133.325  
132.123  
131.502  
129.506  
127.703  
127.603  
77.316  
76.998  
76.680

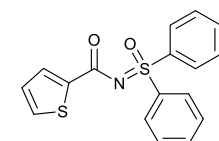

**4m**,  $^{13}\text{C}$  NMR ( $\text{CDCl}_3$ , 100 MHz)

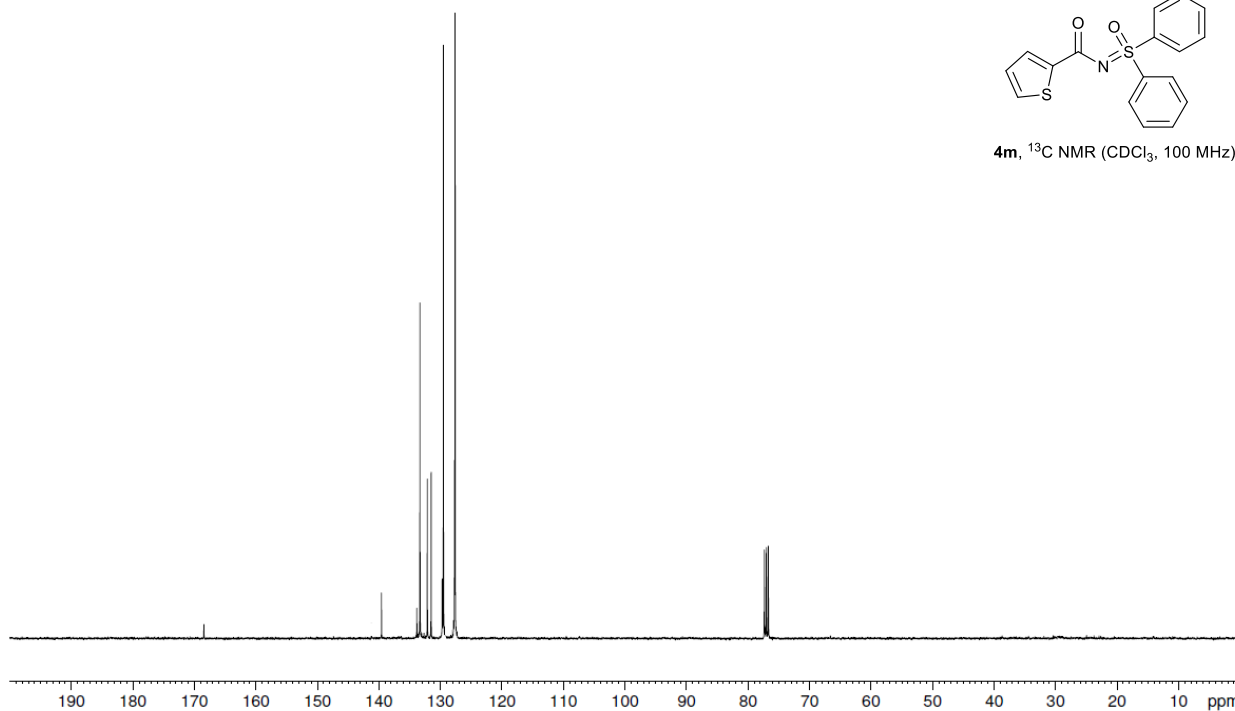

***N*-(Thiophene-3-carbonyl)-*S,S*-diphenyl sulfoximine (4n)**

8.238  
8.236  
8.231  
8.228  
8.062  
8.044  
7.647  
7.645  
7.635  
7.632  
7.584  
7.566  
7.550  
7.531  
7.280  
7.272  
7.267  
7.261

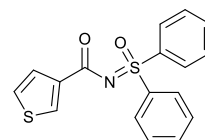

4n, <sup>1</sup>H NMR (CDCl<sub>3</sub>, 400 MHz)

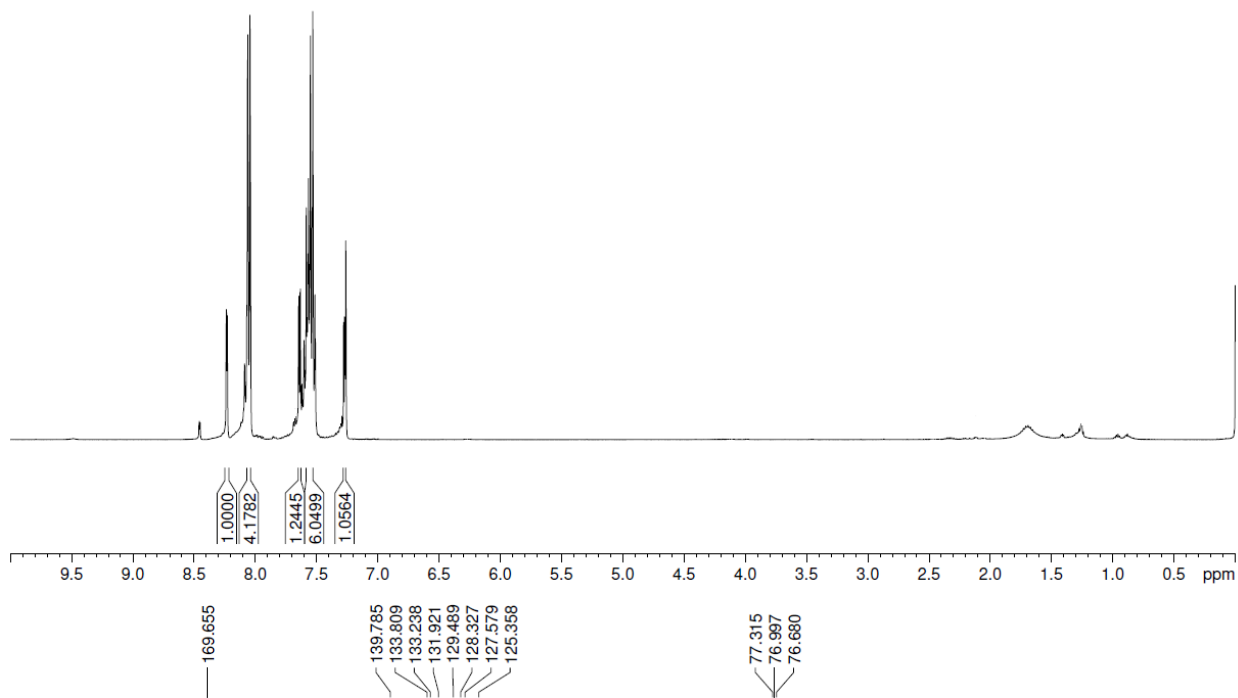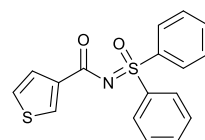

4n, <sup>13</sup>C NMR (CDCl<sub>3</sub>, 100 MHz)

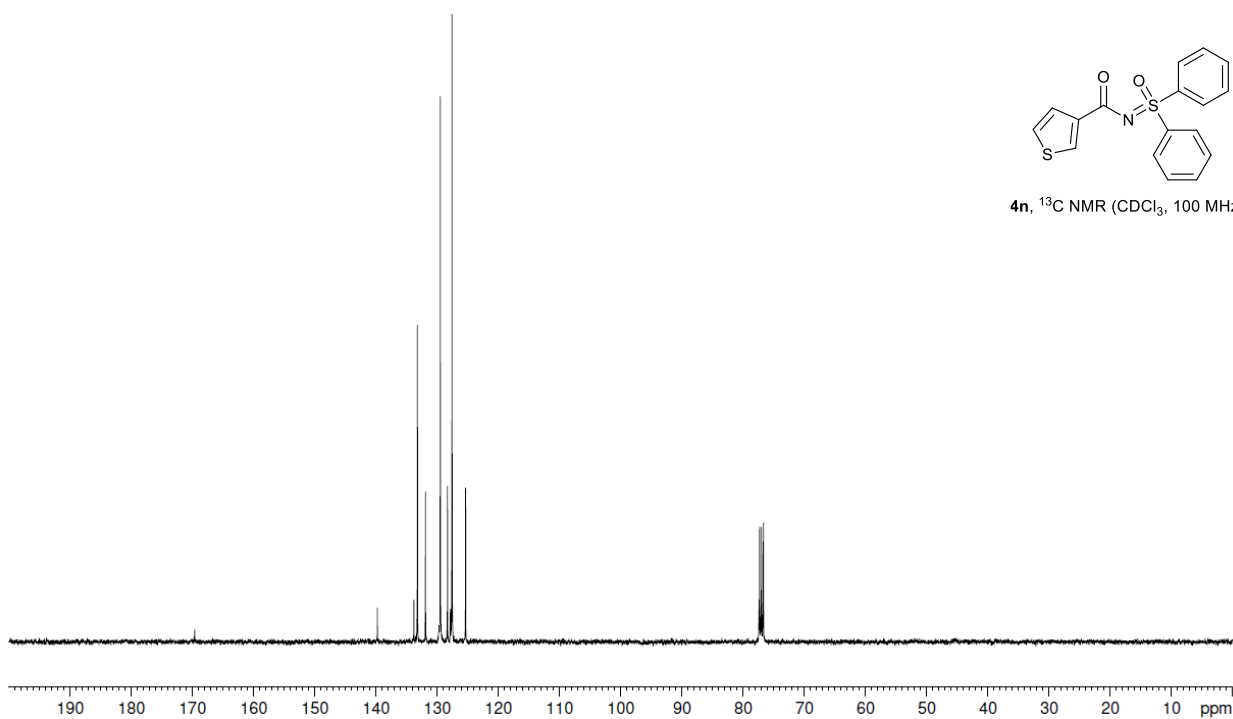

### 2,2,6,6-Tetramethylpiperidin-1-yl benzoate (5)

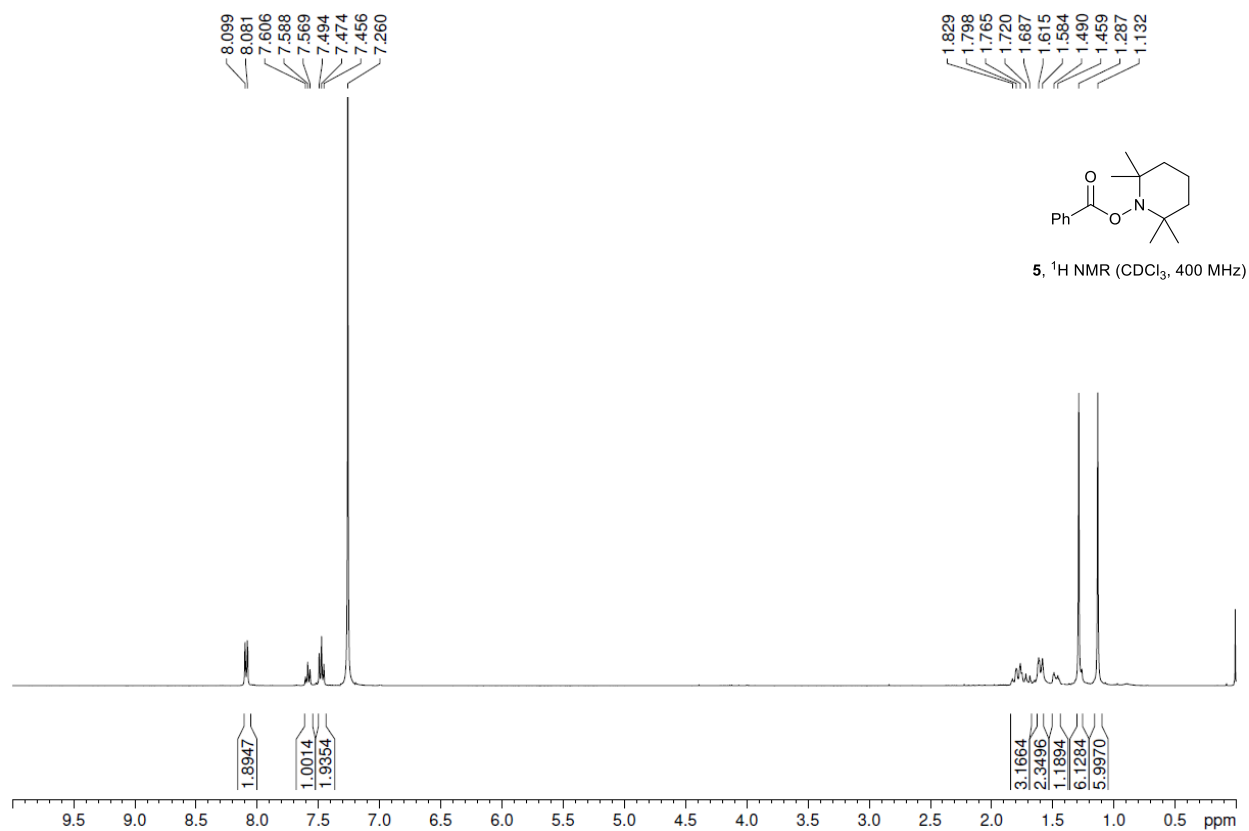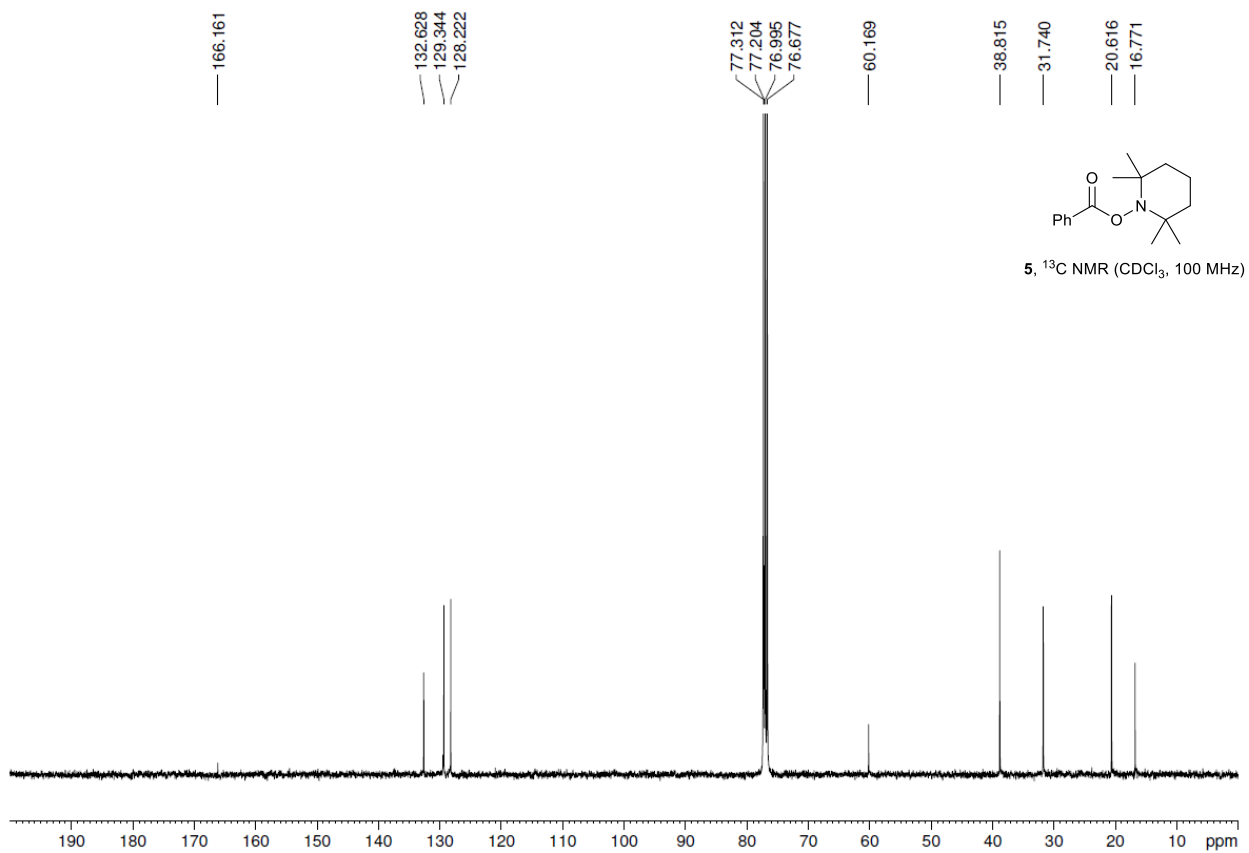

Supplement: c7ob00776k1.pdf [file c7ob00776k1.pdf]
